# Supplementary material
Source: publisher figshare collection journal article supplement (https://gsapubs.figshare.com/articles/dataset/_/12730811)
Supplement: Supplementary file 1 [file 1]

# First direct comparison of U-Pb carbonate and K-Ar illite fault dating methods

## Data Repository

| Contents |                                                       | Page |
|----------|-------------------------------------------------------|------|
| 1        | Full Analytical Methods:                              |      |
|          | 1.1 K-Ar fault gouge dating                           | 1    |
|          | 1.2 XRD methodology                                   | 2    |
|          | 1.3 U-Pb carbonate geochronology                      | 3    |
| 2        | Fault gouge sample descriptions                       | 7    |
| 3        | Calcite sample descriptions:                          | 8    |
|          | 3.1 DDH RVD18-19, 314.06 m slickenfibres sample (19A) | 9    |
|          | 3.2 DDH RVD18-21, 530- 560 m                          | 12   |
|          | DDH RVD18-21, 542m vein A-D sections                  | 13   |
|          | 3.3 DDH RVD18-21-548m vein A-B sections               | 25   |
| 4        | Detailed U-Pb results                                 | 31   |
| 5        | Structural data                                       | 33   |

## 1. Full Analytical methods

### 1.1 K-Ar fault gouge dating

#### 1.1.1 Fault gouge clay separation

Samples were frozen using a shell freezer, then freeze-dried such that they were soft enough to gently crush with mortar/pestle before sieving, without damaging/breaking individual grains. About 300-500 g of freeze-dried sample was transferred to a solderless sieve stack (2 mm, 250 µm, 63 µm, catch pan and lid) and sieved for 5 minutes. The contents of the catch pan (<63 µm fraction) were transferred to a stainless steel milkshake bucket with 250 mL of distilled water. The 63-250 µm fraction was then wet sieved to obtain any additional <63 µm grains still present in that fraction. The <63 µm fraction was mixed in a milkshake bucket using a mixer stand for 2 minutes and then alternately centrifuged, decanted and washed in triplicate for each size fraction. Final clay size fractions were freeze-dried.

#### 1.1.2 K-Ar methodology

Conventional K-Ar dating was selected for this study vs. the encapsulation  $^{40}\text{Ar}/^{39}\text{Ar}$  method, since the latter, especially regarding fine-grained clay minerals, is affected by  $^{39}\text{Ar}$  recoil during sample irradiation and requires non-standardized corrections (Clauer et al., 2012).

Detailed accounts of the conventional K-Ar dating technique have been given by Dalrymple & Lanphere (1969), Faure (1986) and Dickin (1995). Briefly, the ages of rocks or minerals can be determined by measuring the amount of the argon isotope,  $^{40}\text{Ar}$ , in the rocks or in individual minerals relative to the potassium content.  $^{40}\text{Ar}$  is produced by the decay of an isotope of potassium,  $^{40}\text{K}$ . Clays generally contain negligible amounts of argon

when they are formed, although small amounts of atmospheric argon may adhere to the samples, which can be corrected for using the atmospheric  $^{40}\text{Ar}/^{36}\text{Ar}$  ratio of 295.5. Thus, by measuring the ratio of  $^{40}\text{Ar}$  to  $^{40}\text{K}$ , and knowing the decay rate of  $^{40}\text{K}$ , it is possible to calculate the time since the rock or mineral formed.

Potassium content was determined by ICP-OES (Agilent Technologies 725 ICP-OES and a CETAC ASX-520 autosampler). Approximately 20 mg of sample was dissolved with HF and  $\text{HNO}_3$  (see for example Heinrichs & Herrmann, 1990). Once in solution, the samples were diluted to 10-50 ppm K for the ICP-OES analysis. The pooled error of K determination of all samples and standards is better than 2 %.

Ar isotopic determinations were performed using a procedure similar to that described by Bonhomme et al. (1975). Samples were pre-heated under vacuum at 80 °C for several hours to reduce the amount of atmospheric Ar adsorbed onto the mineral surfaces during sample handling. Argon was extracted from the separated mineral fractions by fusing samples within a vacuum line serviced by an on-line  $^{38}\text{Ar}$  spike pipette. The isotopic composition of the spiked Ar was measured with a high sensitivity on-line VG3600 mass spectrometer. The  $^{38}\text{Ar}$  spike was calibrated against international standard biotite GA1550 (McDougall & Roksandic, 1974). After fusion of the sample in a low blank Heine resistance furnace, the released gases were subjected to a two-stage purification procedure with a CuO getter for the first step, two Ti getters and a SORB-AC getter for the second step. Blanks for the extraction line and mass spectrometer were systematically determined and the mass discrimination factor was determined periodically by airshots. Ca. 20 mg of sample material was required for Argon analysis. During the course of the study, international standards HD-B1, LP6, GLO (Hess & Lippolt, 1994, Odin et. al. 1982), and airshots were analysed. The K-Ar ages were calculated using  $^{40}\text{K}$  abundance and decay constants recommended by Steiger and Jäger (1977). The age uncertainties take into account the errors during sample weighing,  $^{38}\text{Ar}/^{36}\text{Ar}$  and  $^{40}\text{Ar}/^{38}\text{Ar}$  measurements and K analysis. K-Ar age errors are within 2-sigma uncertainty.

## **1.2 XRD methodology**

The mineralogy of the various size fractions was determined by X-ray powder diffraction analysis (XRD) using a Bruker D8 Advance XRD equipped with a Lynx-Eye Detector, and Co K $\alpha$  radiation set at 35 kV and 35 mA.

Initial identification of minerals was made using EVA (Bruker Nano Inc.) software with comparison to reference mineral patterns using Powder Diffraction Files (PDF) of the International Centre for Diffraction Data (ICDD) and other available databases. Quantitative analysis of the pressed powder (PP) mounts was carried out using TOPAS (Bruker Nano Inc.), a PC-based program that performs Rietveld refinement (RR) of XRD spectra. Quantitative analyses appear reasonable when minerals in the samples can be matched to the standards. The lower the Goodness of Fit (GoF) value, the closer the standards match the unknowns and the better the results. Semi-quantitative analyses of the smear mounts are based on the Reference Intensity Ratio (RIR) method (EVA software; Bruker Nano, Inc.). The RIR method uses corundum as an internal standard such that the most intense X-ray peak for each mineral phase is compared to the 100% intensity corundum peak (i.e., I/I<sub>c</sub>).

## 1.3 U-Pb carbonate geochronology

### 1.3.1 Sample Characterisation

Carbonate samples were cut and prepared into polished thick (80-100  $\mu\text{m}$  thick) sections. Prior to analysis, sections were investigated using conventional optical polarized and reflected light microscopy to characterise carbonate and mineral inclusions. Subsequently, samples were imaged with Cathodoluminescence (CL) imaging using a CITL cold-cathode CL microscope at Kingston University, UK. All samples were CL-dark except sample 19A (Fig. 8 in this Data Repository) the imaging for the other samples was therefore not useful and is not presented in this manuscript. Carbonate chemistry was qualitatively characterised using EDS analysis using a ZEISS Evo MA 10 Scanning Electron Microscope at the University of Portsmouth (UoP), UK. Carbonate contains Ca, Fe and Mg so is likely dolomitic in composition. See U-Pb methods for details about potential matrix effects.

### 1.3.2 U-Pb analysis

U-Pb carbonate dating was performed at the University of Portsmouth, UK, using an ASI RESOLUTION<sup>®</sup> 193 nm ArF excimer laser coupled to a high sensitivity Jena Analytic PlasmaQuant Elite<sup>®</sup> LA-ICP-MS instrument. Carbonate was analyzed using 80  $\mu\text{m}$  spot size, laser fluence of  $\approx 2.5 \text{ J/cm}^2$ , and a repetition rate of 8 Hz. A 40  $\mu\text{m}$ , 10 Hz, 4.5  $\text{J/cm}^2$  line on NIST612 glass yields a typical sensitivity of  $\sim 1,000,000$  cps U238 and a Hg202 background of 2000 cps. U/Th fractionation was typically  $\sim 0.95$ - $1.05$  and Th oxide production is  $< 0.002$ . There was a 20 s background measurement, followed by 30 s of ablation, and 15 s of washout for each analysis. Four pulses of pre-ablation with a 90  $\mu\text{m}$  spot size and a 15 s washout were used to clean the area before each analysis.

Prior to setting up an analytical run, 40  $\mu\text{m}$  reconnaissance lines (run at 20  $\mu\text{m}/\text{sec}$  speed) and 40  $\mu\text{m}$  30-shot spots were briefly analysed to identify U-rich (1-10 ppm) areas of the carbonate crystals. Analysed spot locations can be found in the material below.

SRM612 glass (NIST612; 38 ppb U and Pb; Pearce et al. 1997) and WC-1 carbonate ( $254.4 \pm 6.4 \text{ Ma}$ ; 5ppm U,  $> 90\%$  radiogenic; Roberts et al. 2017) were used as primary reference materials and Mudtank zircon ( $\sim 12 \text{ ppm}$  U,  $732 \pm 5 \text{ Ma}$ ; Black and Gulson, 1978; Jackson et al., 2004) was used as a secondary reference material to test long-term reproducibility. Analyzes of Mudtank during the analytical periods yielded a  $^{206}\text{Pb}/^{238}\text{U}$  intercept age of  $729 \pm 4 \text{ Ma}$ . Two of each reference materials were ablated between every 8 unknowns. The data were reduced and correcting for instrumental U-Pb drift, downhole fractionation (which was minimal/ non-existent), Pb isotope mass bias, U-Pb normalization and peak correction using NIST612 with Lolite<sup>®</sup> software (Paton et al. 2011). A second correction using an in-house spreadsheet was made using the WC-1 reference material to correct for the final matrix-matched normalization, and non-radiogenic Pb (Parrish et al. 2018; Appendix 3 for more information; average correction factor 1.08). 2 sigma uncertainties and include propagated analytical uncertainties, the reproducibility of WC-1 in each analytical session and a 5% uncertainty on the WC-1 RM have been added in quadrature to all data presented in data tables and in plots. Final quoted uncertainties include an additional 2% uncertainty added in quadrature to account for typical long-term reproducibility of analytical equipment. Any matrix effects caused due to differences between the dolomitic composition of analysed carbonate and the calcite composition of WC-1 is likely to be less than these additional added uncertainties. U-

Pb data are presented on Tera Wasserburg plots using Isoplot 4.15 (Ludwig, 2003) with non-common Pb corrected intercept ages reported with  $2\sigma$  uncertainties.

Table 1: LA-ICP-MS operating conditions

| Laboratory & Sample Preparation |                                                                                                                                                                                                                 |
|---------------------------------|-----------------------------------------------------------------------------------------------------------------------------------------------------------------------------------------------------------------|
| Laboratory name                 | School of Earth and Environmental Science at the University of Portsmouth                                                                                                                                       |
| Sample type/mineral             | Carbonate                                                                                                                                                                                                       |
| Sample preparation              | Fragments of rock with veins, 1" epoxy mount, 1 $\mu$ m polish to finish<br>Thick sections                                                                                                                      |
| Imaging                         | Reflected light image and CL imaging for some samples                                                                                                                                                           |
| Laser ablation system           |                                                                                                                                                                                                                 |
| Make, Model & type              | ASI RESOLution SE ArF (Argon-Fluoride)                                                                                                                                                                          |
| Ablation cell & volume          | Laurin S155 (dual volume design)                                                                                                                                                                                |
| Laser wavelength (nm)           | 193nm                                                                                                                                                                                                           |
| Pulse width (ns)                | 3 ns                                                                                                                                                                                                            |
| Fluence (J.cm <sup>-2</sup> )   | 2.5 J/cm <sup>2</sup>                                                                                                                                                                                           |
| Repetition rate (Hz)            | 8 Hz                                                                                                                                                                                                            |
| Spot size ( $\mu$ m)            | 80 $\mu$ m following 90 $\mu$ m pre-ablation of 4 pulses                                                                                                                                                        |
| Sampling mode / pattern         | Spot, with pre-ablation cleaning spot                                                                                                                                                                           |
| Carrier gas                     | 100% He (0.31 l min <sup>-1</sup> ), Ar make-up gas (0.9 l min <sup>-1</sup> ) combined 50% along sample line in mixing bulb                                                                                    |
| Ablation duration (secs)        | 30 secs, 15 s washout, 20 s background between pulses                                                                                                                                                           |
| Cell carrier gas flow (l/min)   | 100% He (0.310 l/min), N <sub>2</sub> (0.0031 l/min)                                                                                                                                                            |
| ICP-MS Instrument               |                                                                                                                                                                                                                 |
| Make, Model & type              | PlasmaQuant MS Elite (quadrupole) from Analytik Jena                                                                                                                                                            |
| Carrier gas flow rate           | 0.32 l min <sup>-1</sup> He and 0.9 l min <sup>-1</sup> Ar                                                                                                                                                      |
| Auxiliary gas flow rate         | 1.65 l min <sup>-1</sup> Ar                                                                                                                                                                                     |
| RF power (W)                    | 1300 W                                                                                                                                                                                                          |
| Detection system                | 3 MHz quadrupole                                                                                                                                                                                                |
| Masses measured                 | <sup>202</sup> Hg, <sup>204</sup> Hg + Pb, <sup>206</sup> Pb, <sup>207</sup> Pb, <sup>208</sup> Pb, <sup>232</sup> Th, <sup>235</sup> U, <sup>238</sup> U                                                       |
| Integration time per peak (ms)  | 10-15ms                                                                                                                                                                                                         |
| Data Processing                 |                                                                                                                                                                                                                 |
| Gas blank                       | 20 second on-peak zero subtracted                                                                                                                                                                               |
| Calibration strategy            | SRM612 used as primary reference material for downhole corrections, mass fractionation for Pb, and U-Pb drift correction and U-Pb initial normalization; WC-1 was used for carbonate for final U-Pb calibration |
| Reference Material info         | SRM612 glass and 254.4 $\pm$ 6.4 Ma WC-1 for final Pb/U calibration<br>Mud Tank zircon, 732 Ma                                                                                                                  |
| Data processing                 | Iolite <sup>®</sup> 3.4 software, using the 'Linear spline' to correct for downhole                                                                                                                             |



|                                                         |                                                                                                                                                                                                                                                                                                                                                                                                                                                                                                                                                                                                                                                                                                                                       |
|---------------------------------------------------------|---------------------------------------------------------------------------------------------------------------------------------------------------------------------------------------------------------------------------------------------------------------------------------------------------------------------------------------------------------------------------------------------------------------------------------------------------------------------------------------------------------------------------------------------------------------------------------------------------------------------------------------------------------------------------------------------------------------------------------------|
| package used /<br>Correction for LIEF                   | fractionation and the 'Automatic spline' to correct for instrumental drift                                                                                                                                                                                                                                                                                                                                                                                                                                                                                                                                                                                                                                                            |
| Common-Pb correction,<br>composition and<br>uncertainty | <p>using Excel spreadsheet using both <math>^{207}\text{Pbc}</math> and <math>^{208}\text{Pbc}</math> methods (described in Parrish <i>et al.</i> 2018, supplementary material);</p> <p>Measurements of SRM612 glass, WC-1 and Mud Tank zircon were done along with samples throughout all analytical sessions.</p> <p><b>Propagated analytical uncertainties:</b> analytical uncertainties, reproducibility of WC-1 in each analytical session and a 5% uncertainty on the WC-1 RM have been added in quadrature to all data presented in data tables and in plots. Final quoted uncertainties include an additional 2% uncertainty added in quadrature to account for typical long-term reproducibility of analytical equipment</p> |

### 1.3.3 Standard reproducibility

Table 2: Standard reproducibility

| Conditions |        |     |           |            |    |         | uncorrected WC-1 |             | WC-1              | corrected WC-1 |             | Mudtank |        |                 |
|------------|--------|-----|-----------|------------|----|---------|------------------|-------------|-------------------|----------------|-------------|---------|--------|-----------------|
| Sample     | Date   | run | Spot size | power (mJ) | Hz | Primary | Intercept        | uncertainty | Correction factor | Intercept      | uncertainty | WA      | uncert | reproducibility |
| 17A        | 231118 | 2   | 80        | 2.5        | 8  | NIST612 | 273.8            | 3.3         | 1.078             | 254.3          | 3.1         | 718.2   | 3.3    | 1.93            |
| 19A        | 231118 | 2   | 80        | 2.5        | 8  | NIST612 | 273.8            | 3.3         | 1.078             | 254.3          | 3.1         | 718.2   | 3.3    | 1.93            |
| 542B       | 281118 | 3   | 80        | 2.5        | 8  | NIST612 | 279.4            | 3.4         | 1.100             | 254.3          | 3.1         | 695     | 4.9    | 5.09            |
| 548A       | 281118 | 3   | 80        | 2.5        | 8  | NIST612 | 279.4            | 3.4         | 1.100             | 254.3          | 3.1         | 695     | 4.9    | 5.09            |
| 542D       | 31218  | 1   | 80        | 2.5        | 8  | NIST612 | 278.9            | 2.9         | 1.098             | 254.3          | 2.7         | 694.3   | 6.5    | 5.19            |
| 548B       | 31218  | 1   | 80        | 2.5        | 8  | NIST612 | 278.9            | 2.9         | 1.098             | 254.3          | 2.7         | 694.3   | 6.5    | 5.19            |
| 542A       | 41218  | 1   | 80        | 2.5        | 8  | NIST612 | 266.9            | 2.9         | 1.051             | 254.1          | 2.8         | 732     | 7.2    | 0.04            |
| 542C       | 41218  | 1   | 80        | 2.5        | 8  | NIST612 | 266.9            | 2.9         | 1.051             | 254.1          | 2.8         | 732     | 7.2    | 0.04            |
| Average    |        |     |           |            |    |         |                  |             | 1.082             | 254.4          | 1.5         | 708.6   | 3.3    | 3.24            |

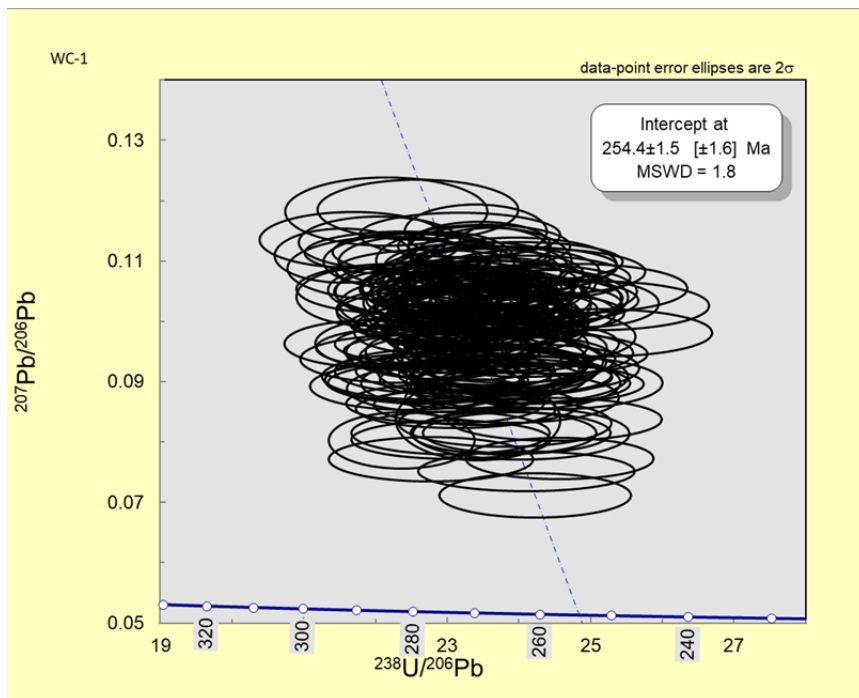

Figure 1: Tera Wasserburg plot of all corrected WC-1 analytes for all analytical sessions (non-corrected data included in Table 2)

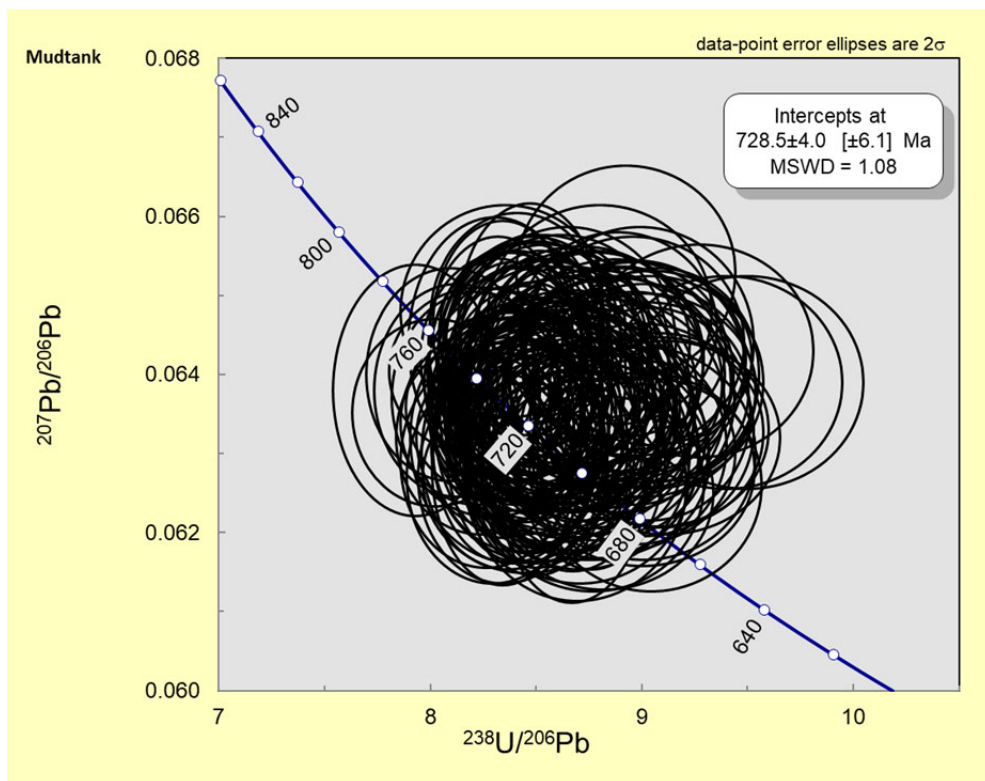

Figure 2: Tera Wasserburg plot of all Mudtank analytes for all analytical sessions (Table 2)

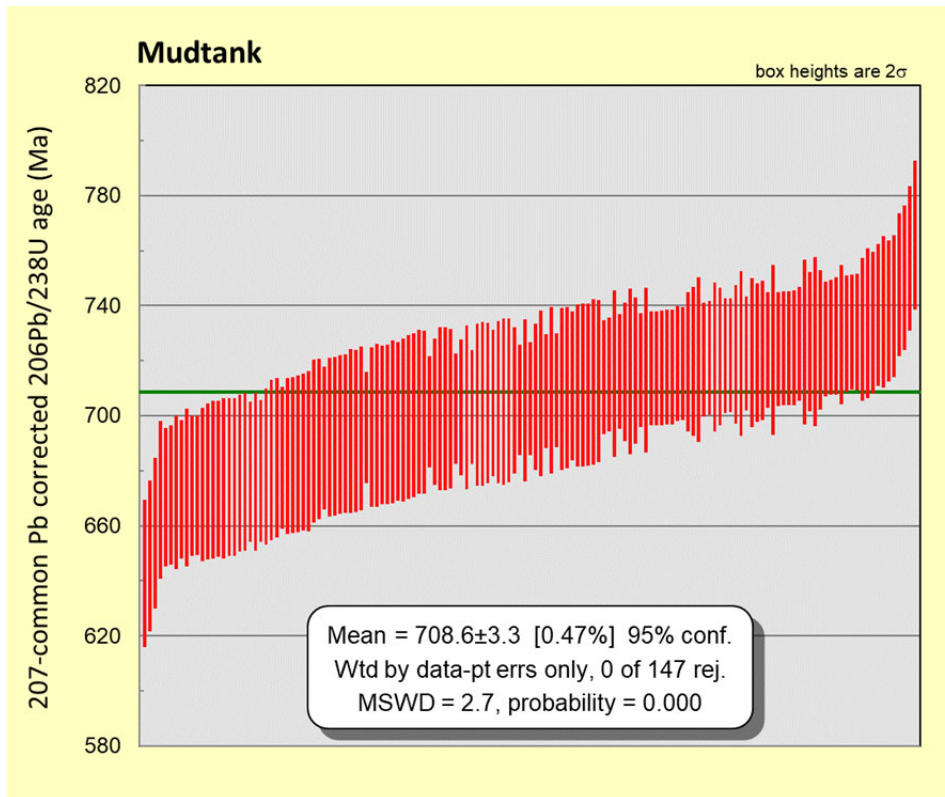

Figure 3 U/Pb weighted average of all Mudtank analyses for all analytical sessions (Table 2)

## 2. Fault gouge sample descriptions

| Sample         | Lat         | Long         | Notes                                                                                                                                                                                                                                                                                                                                                                                                                                                                                                                        |
|----------------|-------------|--------------|------------------------------------------------------------------------------------------------------------------------------------------------------------------------------------------------------------------------------------------------------------------------------------------------------------------------------------------------------------------------------------------------------------------------------------------------------------------------------------------------------------------------------|
| Seymour Creek  | 62.31029 °N | 137.20890 °W | Several narrow gouge zones cut through fractured and highly altered Stoddart Creek monzonite were temporarily exposed from beneath thick river gravels and sands in workings of a placer operation in Stoddart Creek. Gouge zones have general NW-SE strike and $\sim 60^\circ$ dip. Sampled gouge zone is 20 cm wide seam of orangey-brown clay with fault walls oriented $097^\circ/75^\circ$ . No obvious offsets or kinematics. Some slickenlines, but difficult to measure in place, and no mineral growth on surfaces. |
| Mechanic Creek | 62.33398 °N | 137.31621 °W | Gouge was sampled from a 5 m wide sub-vertical gouge zone of white-grey and brown gouge bounded by intensely silica-altered wall rock trending at $150^\circ/330^\circ$ within Whitehorse suite granodiorite. An adjacent and parallel gouge seam is 10 m wide.                                                                                                                                                                                                                                                              |
| Happy Creek    | 62.33956 °N | 137.23584 °W | Gouge was sampled from a stream outcrop of 20 cm wide yellow-grey gouge oriented $\sim 173^\circ/74^\circ$ hosted in Paleozoic layered schist/gneiss                                                                                                                                                                                                                                                                                                                                                                         |

|                                       |            |             |                                                                                                                                                                                                                             |
|---------------------------------------|------------|-------------|-----------------------------------------------------------------------------------------------------------------------------------------------------------------------------------------------------------------------------|
| Blue Sky Porphyry Breccia (RVD-18-21) | 62.33166°N | 137.25294°W | Fault gouge clay was sampled from the 557.26-558.40 m interval within brecciated granodiorite. Abundant sulphide-bearing (mostly pyrite) calcite veins above, and sampled calcite slickenfibres beneath the gouge interval. |
|---------------------------------------|------------|-------------|-----------------------------------------------------------------------------------------------------------------------------------------------------------------------------------------------------------------------------|

### 3. Calcite sample descriptions

Table 3: Summary of all analyzed calcite samples, U content and U-Pb date (if successful)

| Core all DDH | Depth (m) | Description                                                           | Orientation  | Carbonate sample | Dated (Ma)                                        | Average U (ppm) | Minimum U (ppm) | Maximum U (ppm) |
|--------------|-----------|-----------------------------------------------------------------------|--------------|------------------|---------------------------------------------------|-----------------|-----------------|-----------------|
| RVD18-17     | 282.5     | Slickenfibres                                                         | Not oriented | 17A              | Not successful                                    | 0.3             | NA              | NA              |
| RVD18-17     | 437.1     | Slickenfibres                                                         | Not oriented | 17B              | Not successful                                    | <0.1            | NA              | NA              |
| RVD18-19     | 314.06    | Slickenfibres on fracture cross cutting Quartz-feldspar porphyry dyke | Not oriented | 19A              | $56.8 \pm 1.2$ [ $\pm 1.7$ prop] (MSWD 2.6, n=42) | 9.7             | 1.7             | 32.4            |
| RVD18-21     | 542.44    | Mineralized vein                                                      | 239/73       | 542A             | $72.8 \pm 1.1$ [ $\pm 1.7$ prop] (MSWD 1.8, n=39) | 6.0             | 1.0             | 14.8            |
|              |           |                                                                       | 239/73       | 542B Blocky      | $72.6 \pm 3.1$ [ $\pm 3.4$ prop] (MSWD 2.4, n=15) | 6.3<br>0.5      | 1.1<br>0.2      | 17.3<br>0.6     |

|  |                |                                        |                 |               |                                              |      |      |      |
|--|----------------|----------------------------------------|-----------------|---------------|----------------------------------------------|------|------|------|
|  |                |                                        |                 | vuggy         | 57.8 ± 5.9 [± 6 prop]<br>(MSWD 2.8, n=22)    |      |      |      |
|  |                |                                        | 239/73          | 542C<br>vuggy | 60.3 ± 2.3 [± 2.6 prop]<br>(MSWD 3.1, n=22)  | 2.3  | 0.6  | 9    |
|  |                |                                        | 239/73          | 542D<br>vuggy | 59.1 ± 2.4 [± 2.7 prop]<br>(MSWD 2.2, n=40 ) | 2.9  | 0.2  | 19.9 |
|  | 548.44         | Mineralized<br>vein                    | 242/65          | 548A<br>vuggy | 58.1 ± 1.8 [± 2.1 prop]<br>(MSWD 1.9, n=44)  | 3.0  | 0.05 | 6    |
|  |                |                                        | 242/65          | 548B<br>vuggy | 54.8 ± 6.4 [± 6.5 prop]<br>(MSWD 3.7, n=29)  | 0.3  | 0.08 | 1.3  |
|  | 557.26-<br>558 | Cataclasite<br>and grey fault<br>gouge | ~N-S            | K-Ar<br>gouge | 58.7±1.4, 57.2±1.3 and 44.4±1.1 Ma           |      |      |      |
|  | 566.24         | Slickenfibres                          | Not<br>oriented | 21A           | Not successful                               | <0.1 | NA   | NA   |

All samples were collected from Diamond Drill Hole Core (DDH)

### 3.1 DDH RVD18-19, 314.06 m slickenfibres sample (19A)

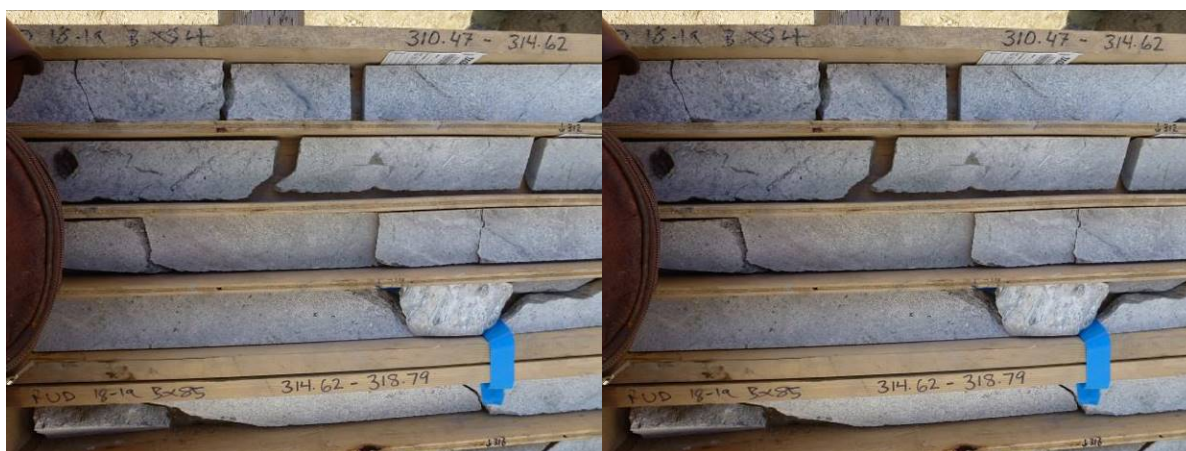

Figure 1: RVD-18-19 @ ~310-314 m quartz-feldspar porphyry dyke cross cut by fractures with slickenfibres

**General Host rock:** The samples in core RVD18-19 come from biotite granodiorite with subhedral feldspars throughout and similar to the Revenue granodiorite seen locally through the Revenue area. The granodiorite is cut by buff-coloured Quartz-Feldspar-Porphyry (QFP) dykes (Fig. 4) at two intervals in this core: 310.77-316.28 m and 462.65-476.96 m. Both QFP are characterized by medium-grained feldspar porphyry with distributed quartz

eyes and euhedral Kspar xenoliths up to 1 cm in size. The groundmass is fine-grained alteration sericite. The QFP crosscuts the granodiorite with thin chilled margins. The QFP dyke from 310.77-316.28m is crosscut by ~1 cm wide “V3” quartz-chalcopyrite-carbonate dykes and thin <1 mm quartz, carbonate and sulphide “stringers” and fractures with fine chlorite-carbonate slickenfibres. At ~311.90 m there is a triangular-shaped ~2 cm across chalcopyrite- quartz infill in the QFP dyke similar to breccia fill seen elsewhere in the Bluesky breccia. At ~318 m there is a rubbly gouge zone possibly representing a small fault surface that the fractures and slickenfibres could be related to. As this core was not oriented it is not possible to know the regional orientation of this structure. The lower QFP dyke is fractured and has minor mineralized stringers but no veining, slickenfibres or breccia fill.

#### **Slickenfibres:**

This sample is a fracture within a QFP dyke with intergrown chlorite-carbonate slickenfibres on the surface. Slickenfibres form a <1 mm thick veneer (Figure 5) and there are some poorly defined steps but with unresolvable sense of motion due to unoriented core. In thin section, the sample has several shear surfaces within the QFP dyke (Figure 5) indicating that fracturing occurred on multiple surfaces. Analyses were conducted along the length of the slickenfibre (Figure 6).

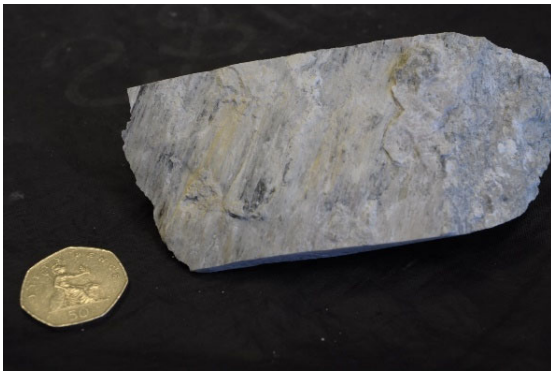

Figure 2: Sample RVD18-19-314 “19A” in hand specimen

#### **DDH RVD18-19, 314m (“19A”)**

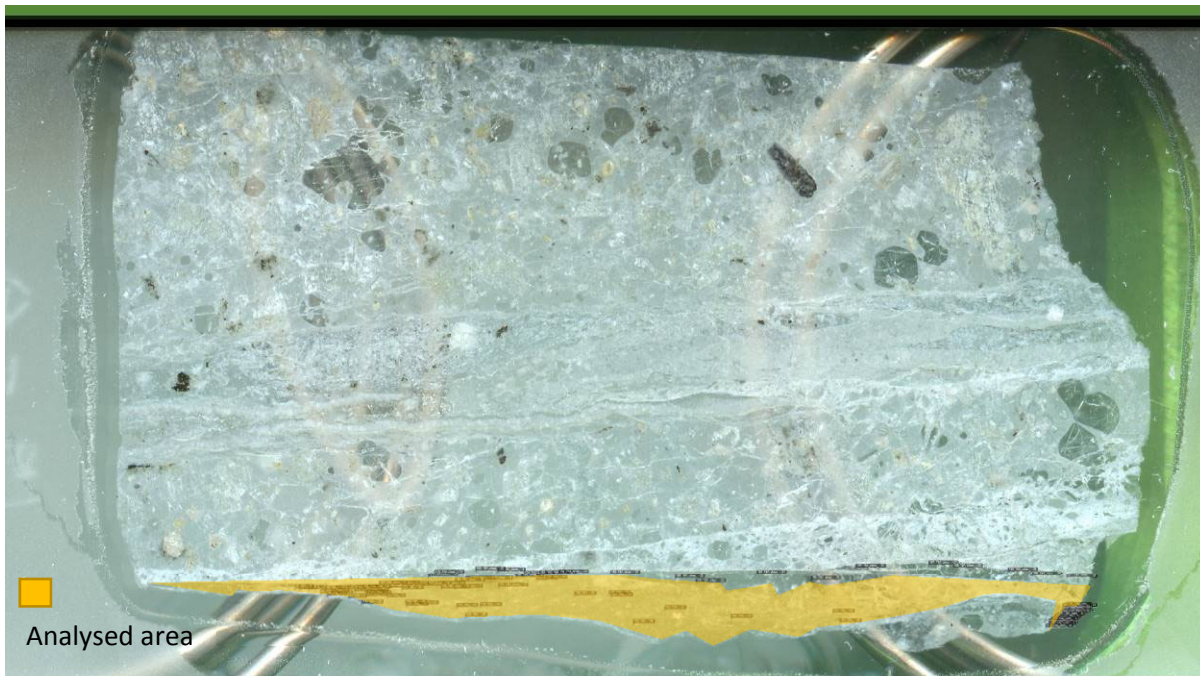

Figure 3: Sample RVD18-19-314 “19A” showing analysed portion of the material (highlighted in yellow).



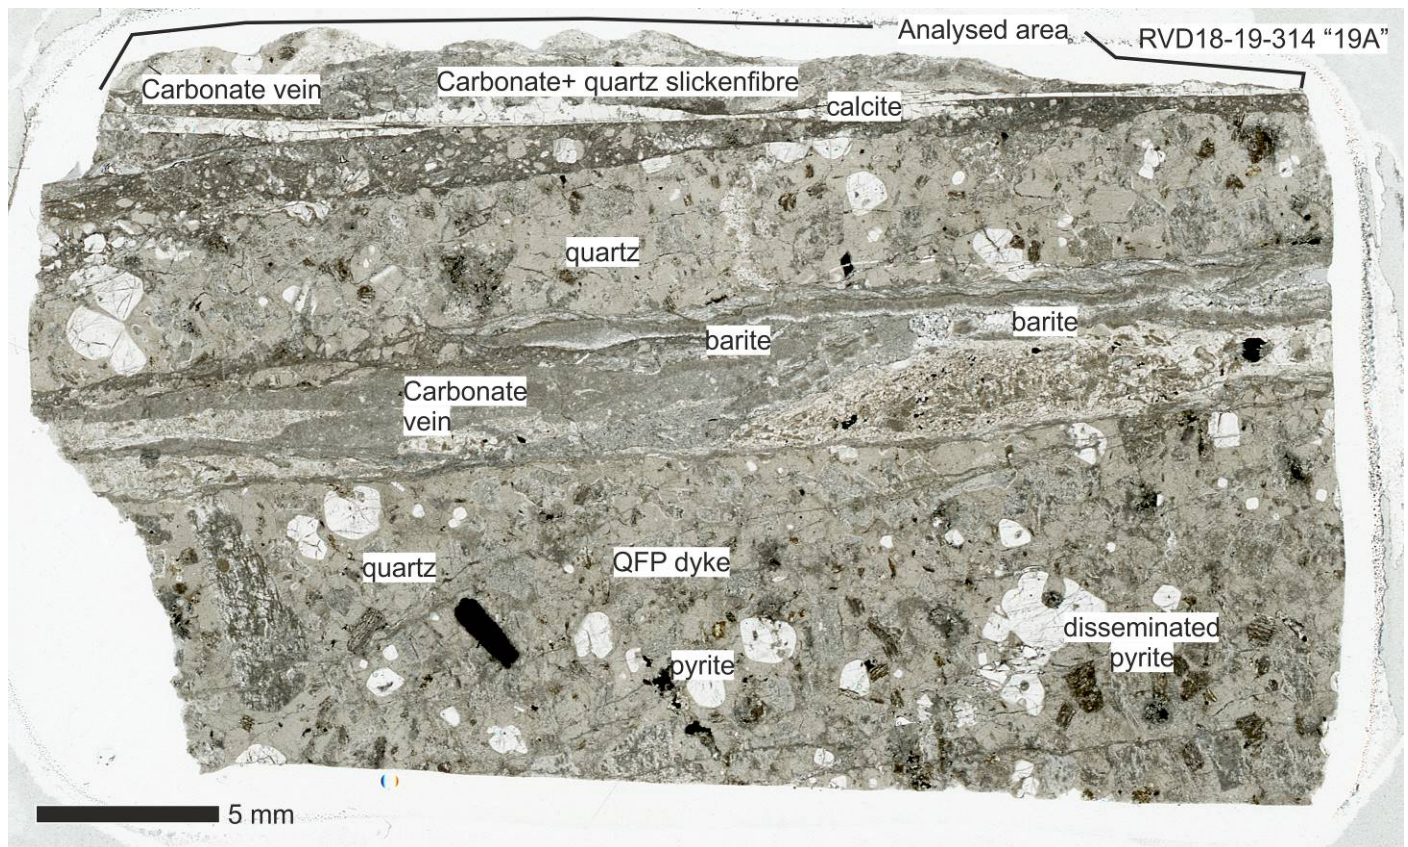

Figure 4: RVD18-19-314 "19A" with key minerals annotated

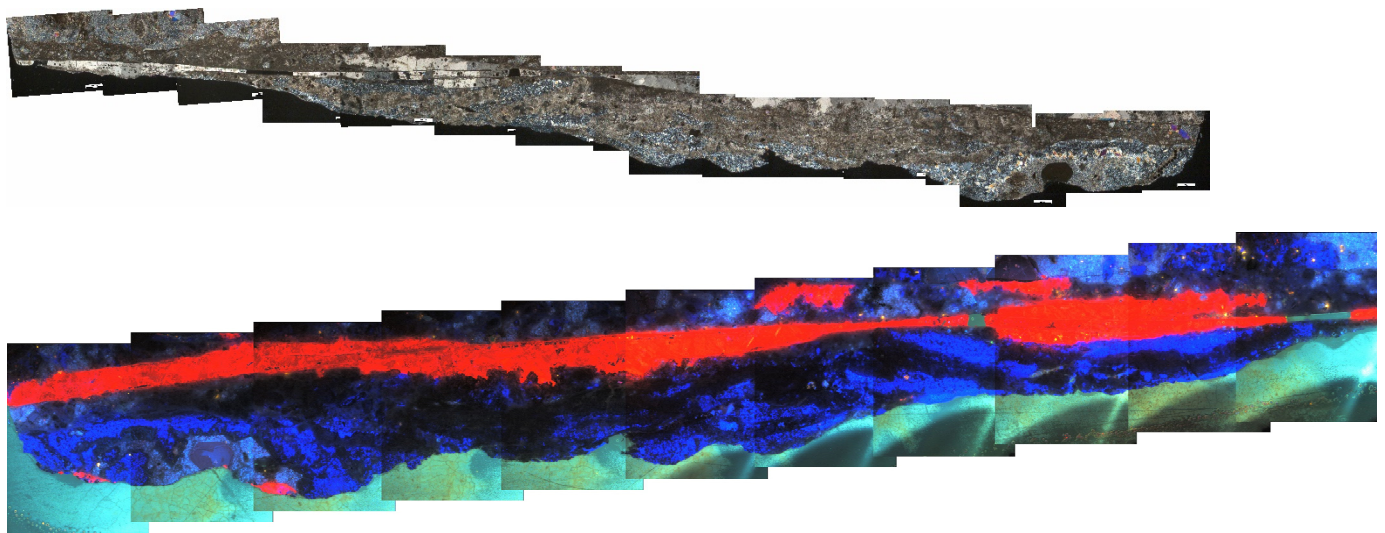

Figure 5 Stitched XPL-polar photomicrograph of sample RVD18-19-314 "19A" and stitched CL image



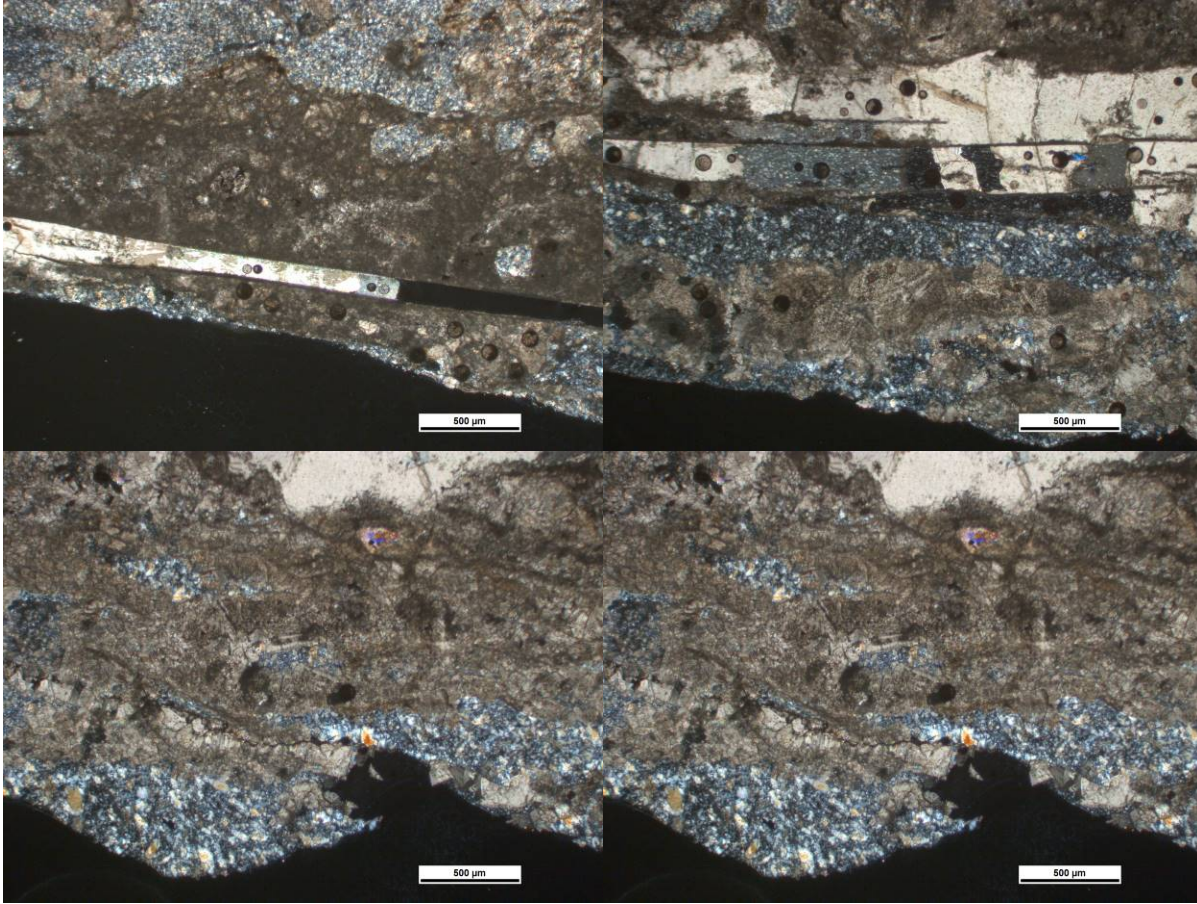

Figure 6: XPL photomicrograph of sample RVD18-19-314 "19A"

### 3.2 DDH RVD18-21, 530- 560 m

**General Host rock:** This section of core is a dark grey to black to altered greenish-grey medium-grained biotite-hornblende (bio-hbl) granodiorite with 35% feldspar, 40% quartz, 15-20% K feldspar, 5-10% 2-5 mm biotite and 5% hornblende. Throughout this section the core is intact with 4-5 NE-SW striking cross cutting multi-layered grey-pink quartz-carbonate-sulphide veins striking 239/73 (RHR) and 242/65 (RHR) for 542m and 548 m respectively. Between 553.07-559.31m there is a rubbly fault zone that is dominated by cataclasite and grey fault gouge. Due to the rubbly nature of the core orientation measurements are challenging to take, however the upper fault contact was measured at 006/66 (RHR) and 035/35 (RHR) for a fault fabric within the fault zone.



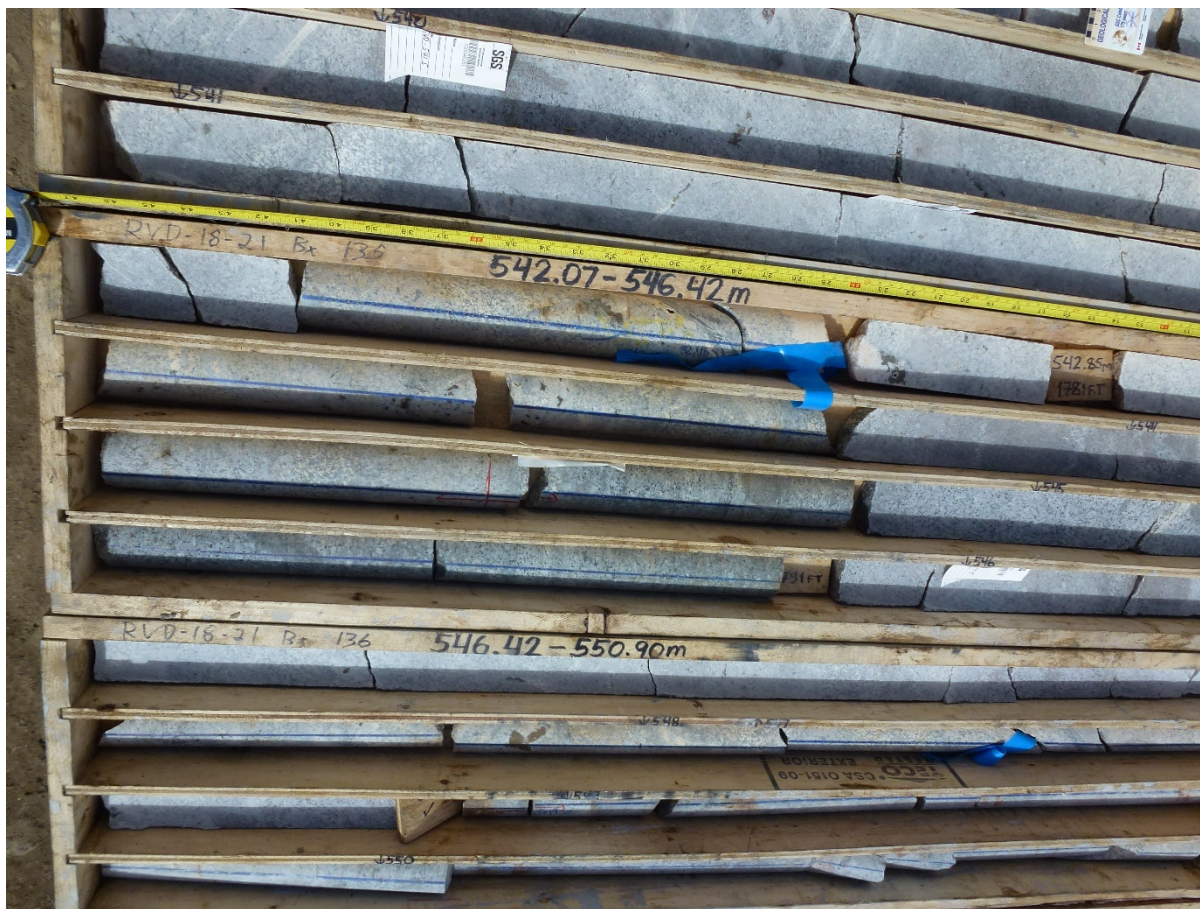

Figure 7: RVD-18-21 ~542-546m medium grained granodiorite cross cut by mineralized carbonate veins

#### DDH RVD18-21, 542m

This NE-SW (239/73) striking, high angle vein has several layers- a whitish grey 5 mm carbonate vein with a pyrite selvage on one side, a ~1-1.5 cm thick concordant pinkish vuggy carbonate layer that is concordant with a 5 mm thick zone of fine grained quartz/chalcedony and additional pyrite and carbonate veins (Figure 8). All veins are oriented 239/73 (Figure 10-11).

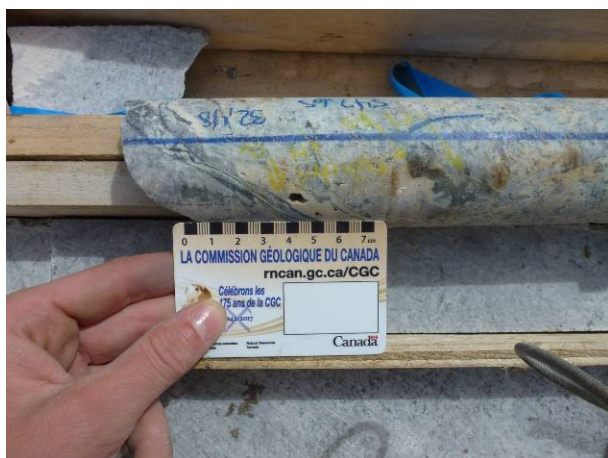

Figure 8: Hand specimen photographs of RVD18-21-542m layered carbonate vein

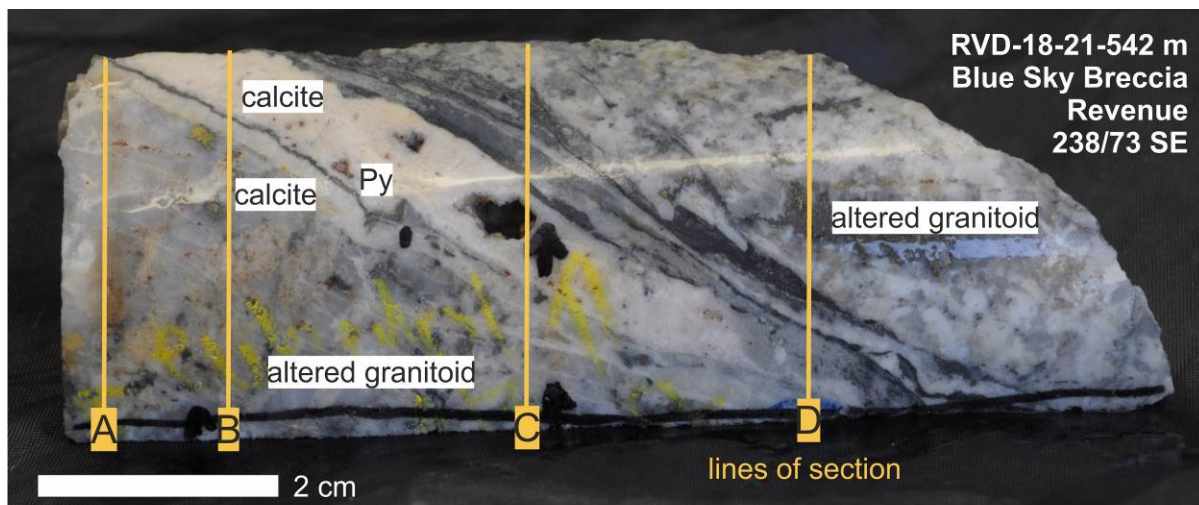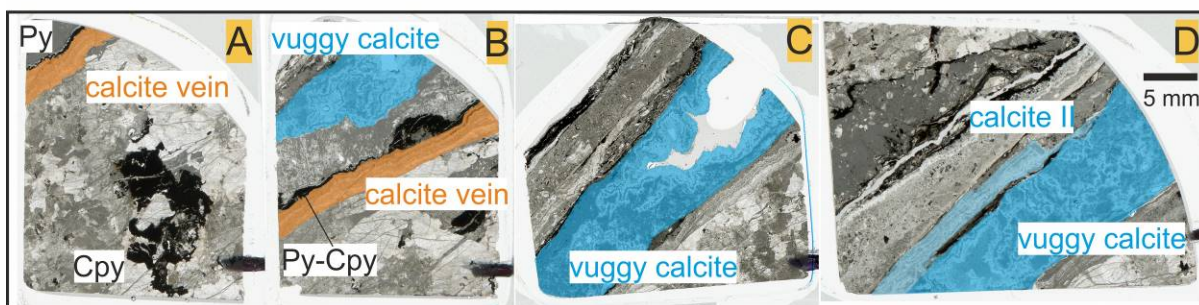

Figure 9: Hand specimen of sample RVD18-21-542m that has been cut into 4 sections through the layered carbonate vein. Thin section images A-D show the different characteristics between the thin (~5 mm) crustiform carbonate with pyrite crust (highlighted in orange), and the thicker vuggy calcite and other secondary calcite veins (highlighted in blue).

#### 542A thin section characterization

Section 542A is comprised of altered granitoid with disseminated pyrite and chalcopyrite (Figure 14). At the top of the section is a ~3 mm thick carbonate vein, where euhedral rhomboid crystals form an elongate-blocky vein texture. It can be interpreted that the carbonate crystals grew from the wall altered granitoid. A layer of pyrite encrusts the edge of the carbonate vein, with carbonate crystals euhedrally in contact with the pyrite which can be seen to wrap around the carbonate (Figure 15). These textures can be interpreted to suggest that pyrite grew either at the same time as the carbonate or was (re)mobilized and (re)crystallized at the edge of the vein.



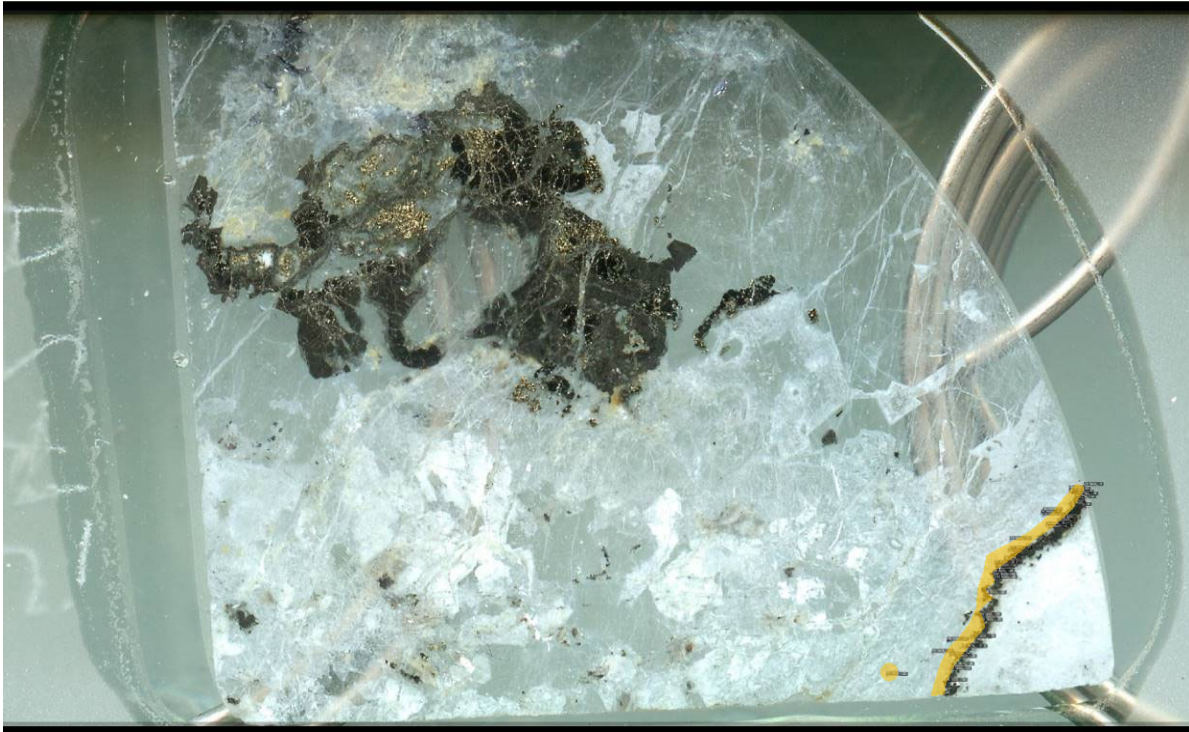

*Figure 10: Section RVD18-21-542A Analysed portion of crustiform vein is highlighted in yellow*

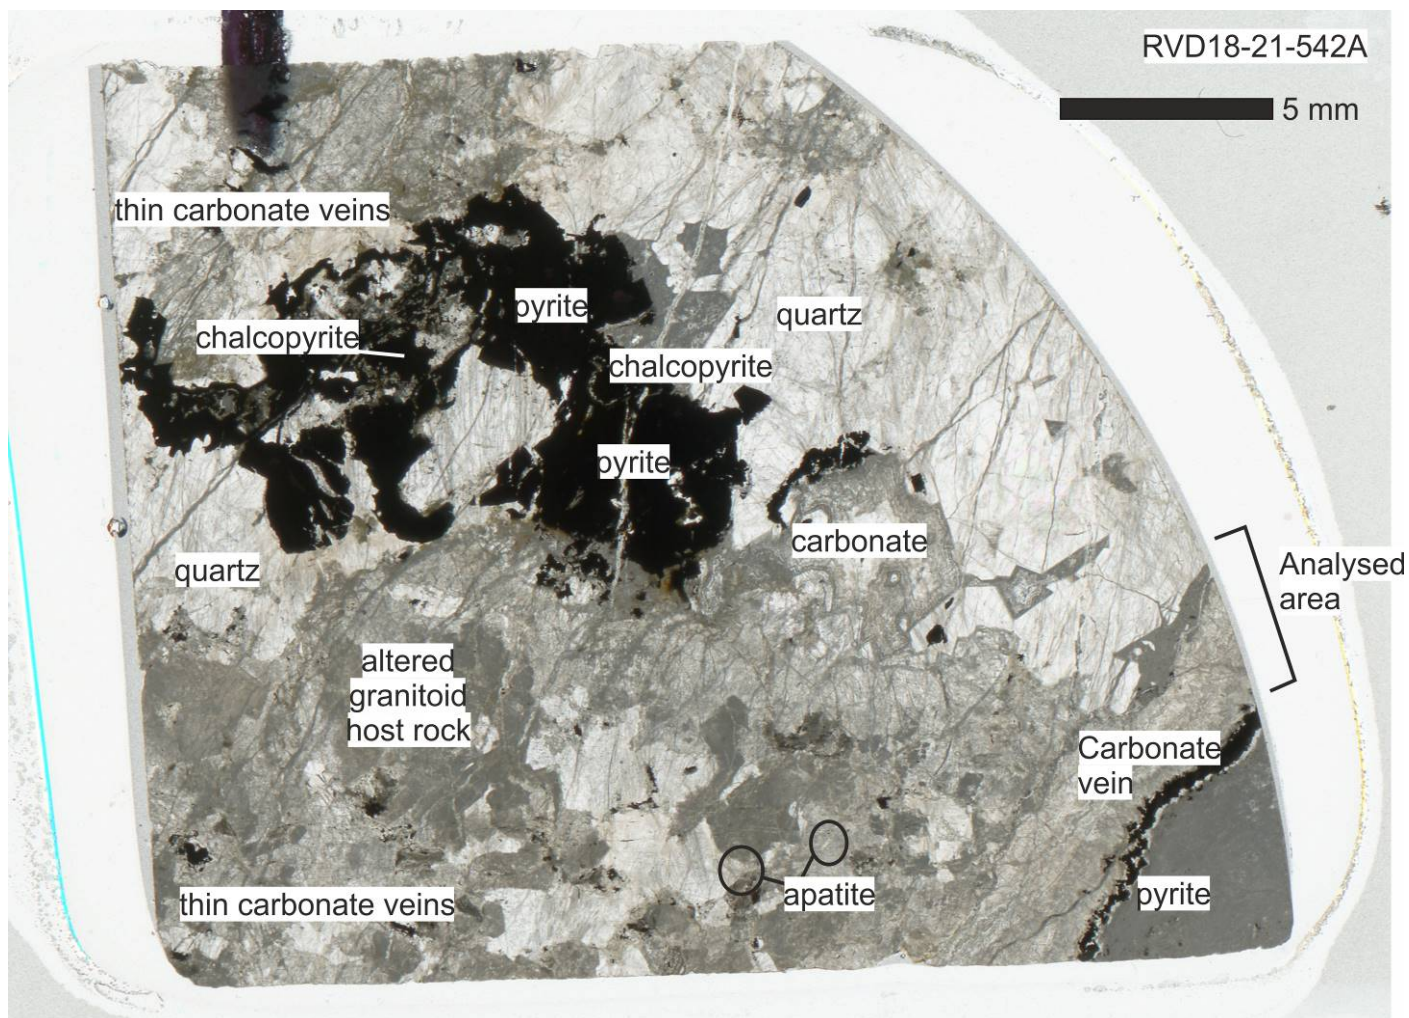

Figure 11: RVD18-21-542A with key minerals annotated



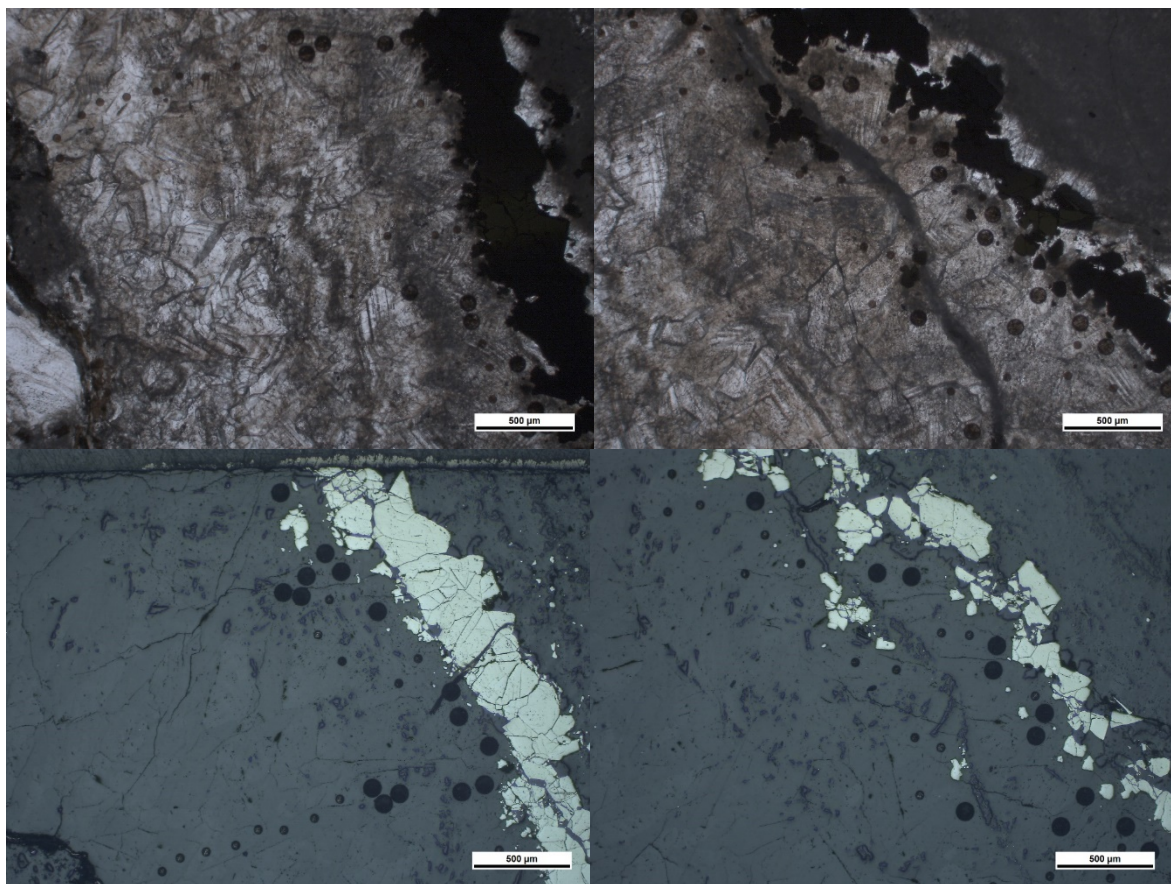

*Figure 12: XPL and reflected light images of crustiform carbonate in sample RVD18-21-542A*

### **542B thin section characterization**

Section 542B is an altered granodiorite with disseminated pyrite. This granitoid is cut by two carbonate veins. (1) In similarity with 542A, a ~3 mm carbonate vein shows euhedral-elongate-blocky textures (Figures 16-17). This texture can be interpreted as carbonate growth from the wall rock. The carbonate is encrusted with pyrite and the carbonate and pyrite can be seen to be intergrown (Figure 18). (2) There is a massive (1.5 cm thick) vuggy carbonate vein with euhedral minerals (Figure 17, 19). These crystals can be interpreted to have grown from the walls into the centre of the vein where there are voids.

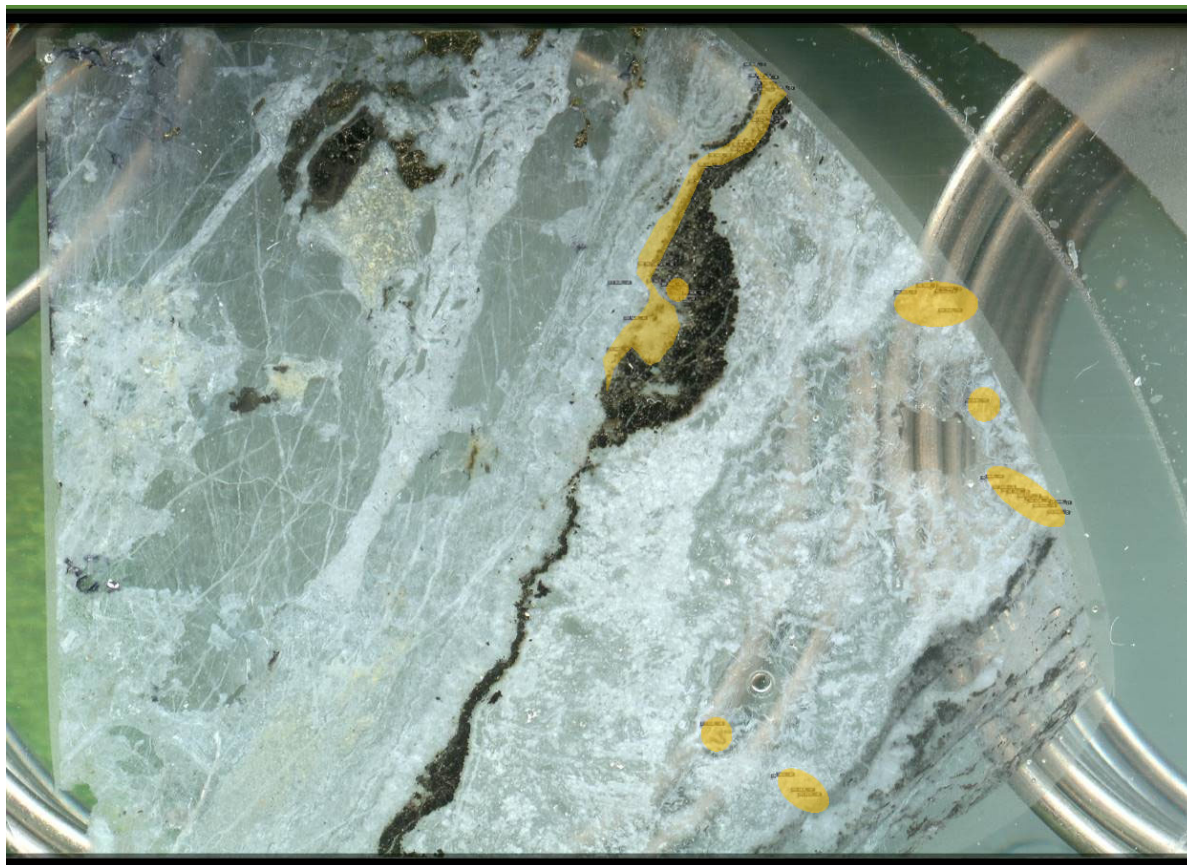

*Figure 13: Section RVD18-21-542B Analysed portion of crustiform vein and vuggy carbonate is highlighted in yellow*



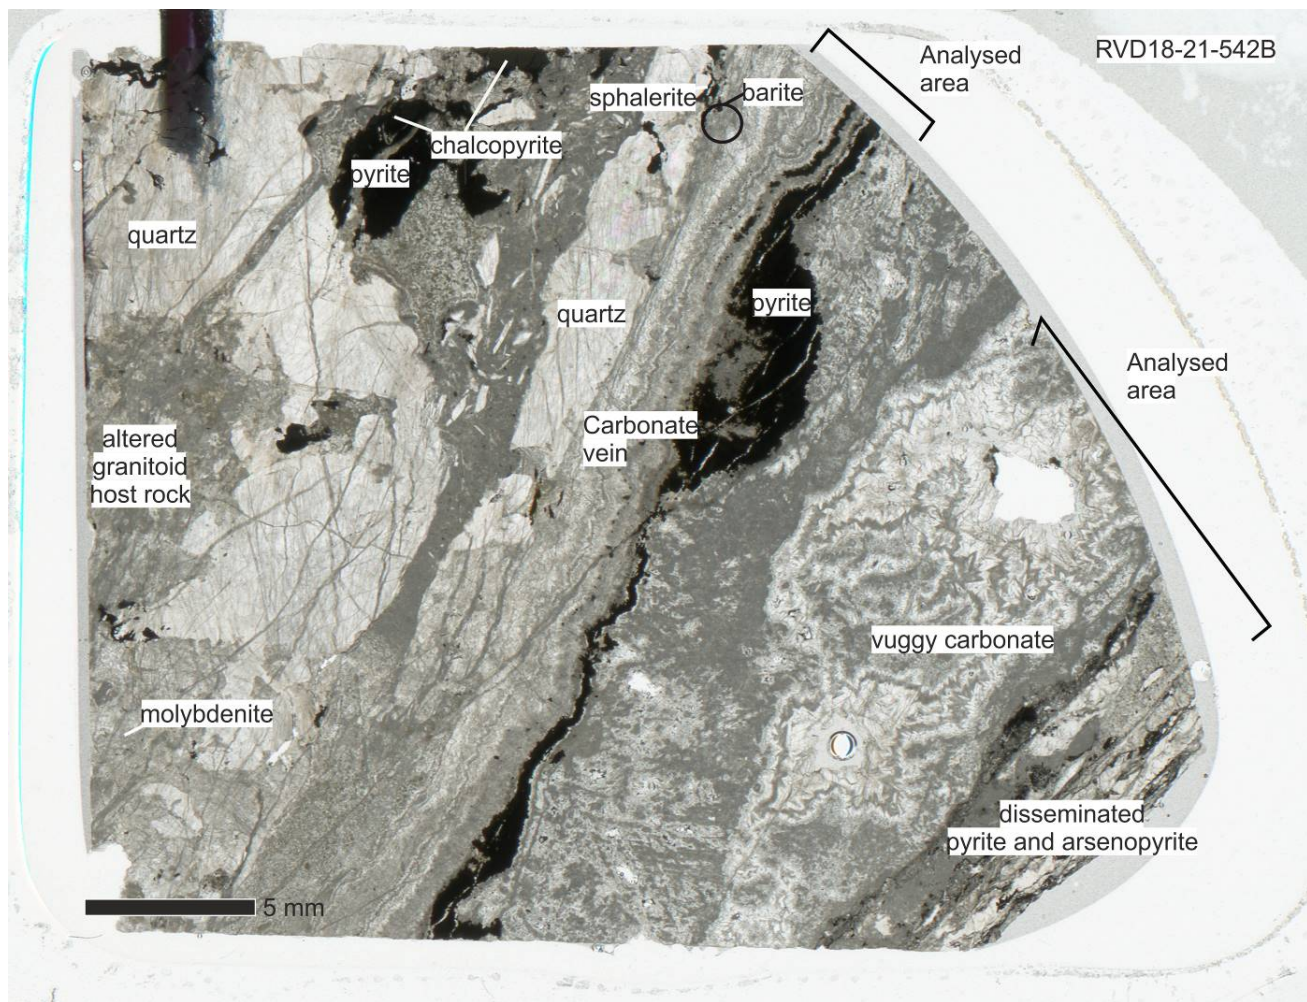

Figure 14: RVD18-21-542B with key minerals annotated

542B thin section characterization

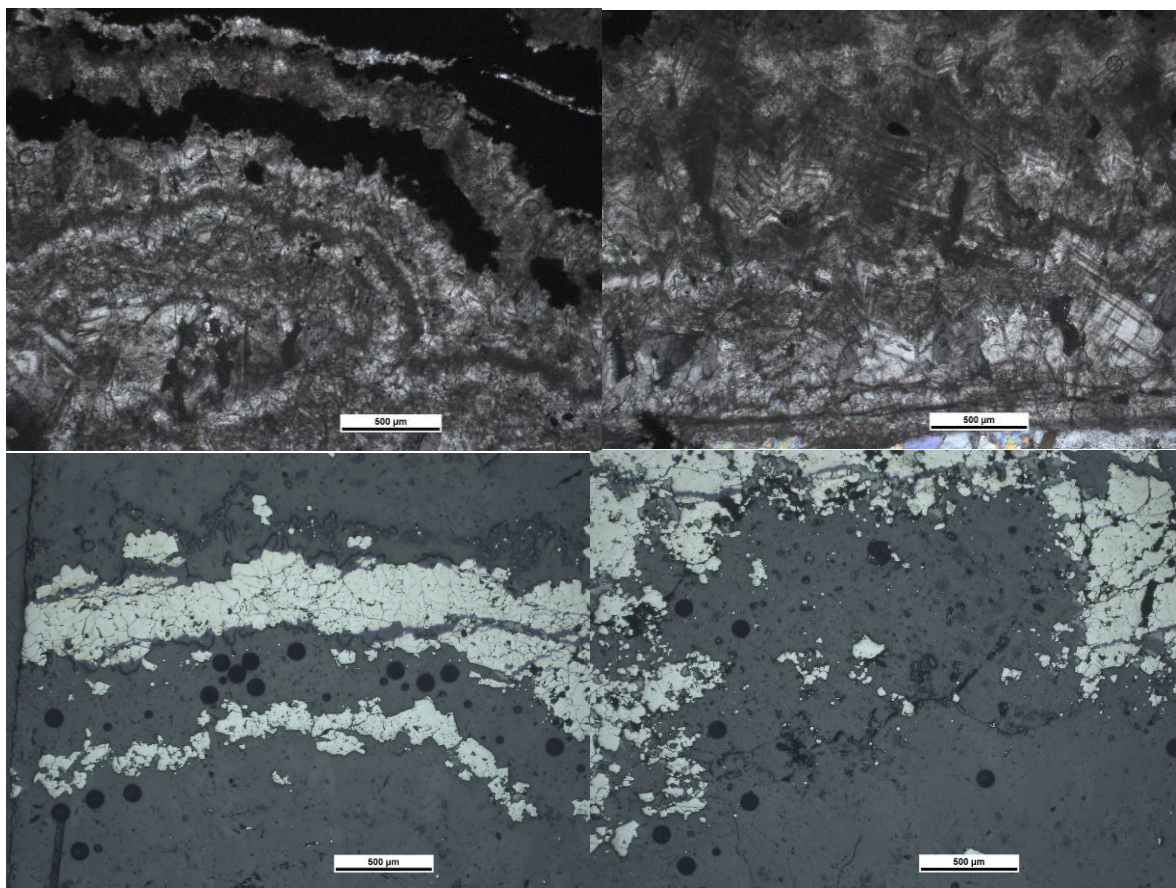

*Figure 15: X-polarized and reflected light images of crustiform carbonate in sample RVD18-21-542B*



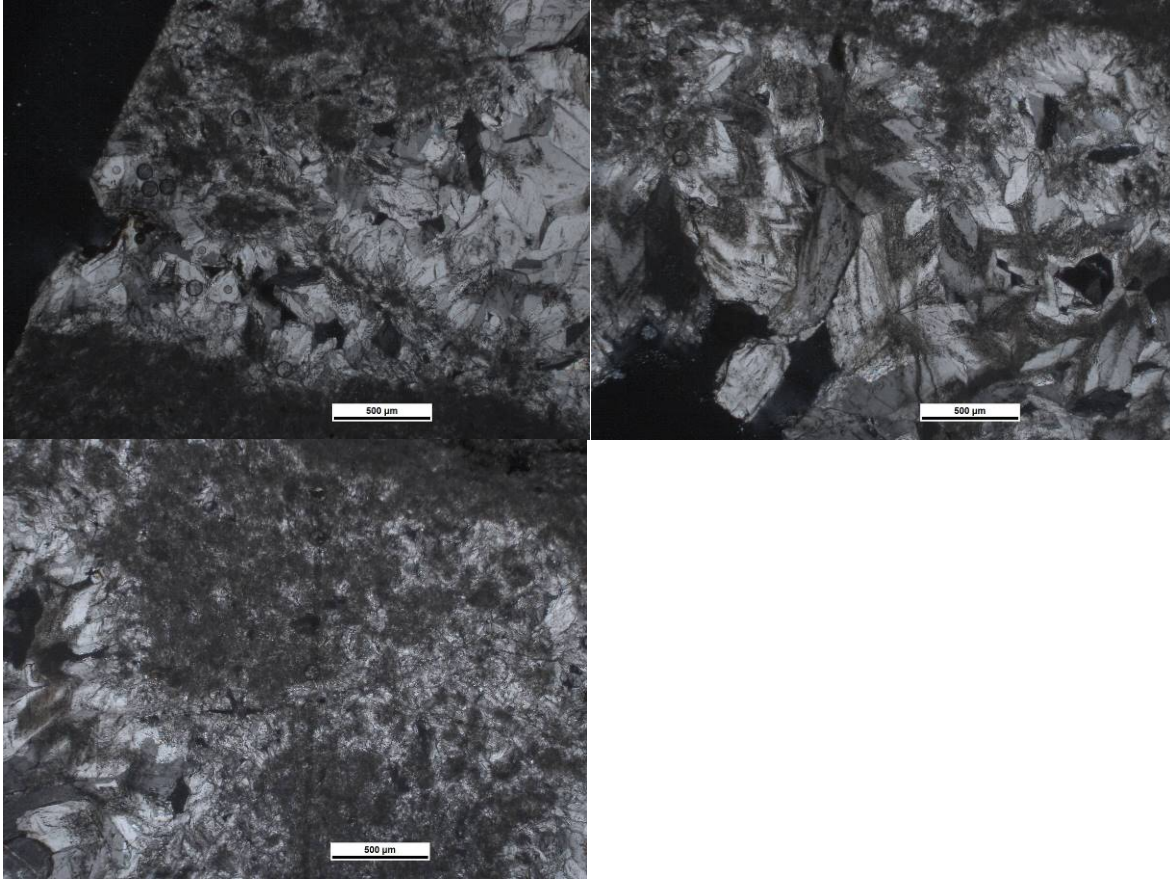

*Figure 16: X-polarized and reflected light images of vuggy carbonate in sample RVD18-21-542B*

#### **542C thin section characterization**

Section 542C is altered granitoid wall rock, cross cut by the ~1.5 cm thick vuggy carbonate vein (2) described in section 542C (Figure 20-21). The walls of this vein have a finer-grained carbonate and crystal size increases to ~1-2 mm in the centre of the vein which also contains voids (Figure 21). Intergrown with the larger carbonate crystals are very fine-grained carbonate (Figure 22). Both the coarse and fine-grained carbonate were analysed (laser spots can be seen in Figure 22). The edges of the vein are concordant with very fine-grained silica that can be interpreted as a small fault zone.

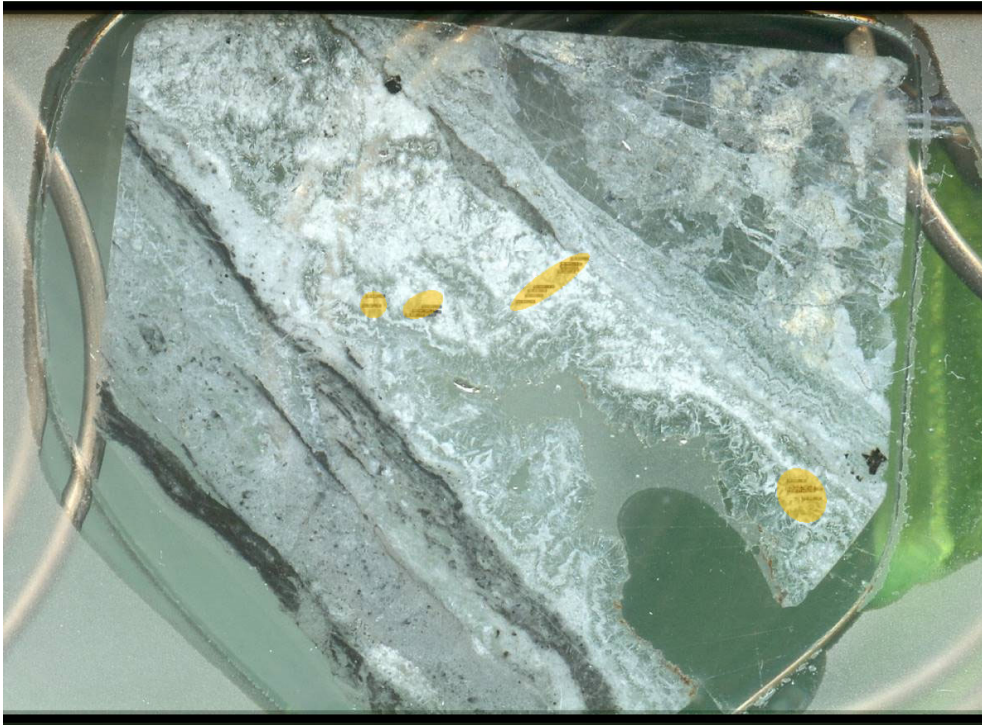

Figure 17: Section RVD18-21-542C Analysed portion of vuggy carbonate is highlighted in yellow

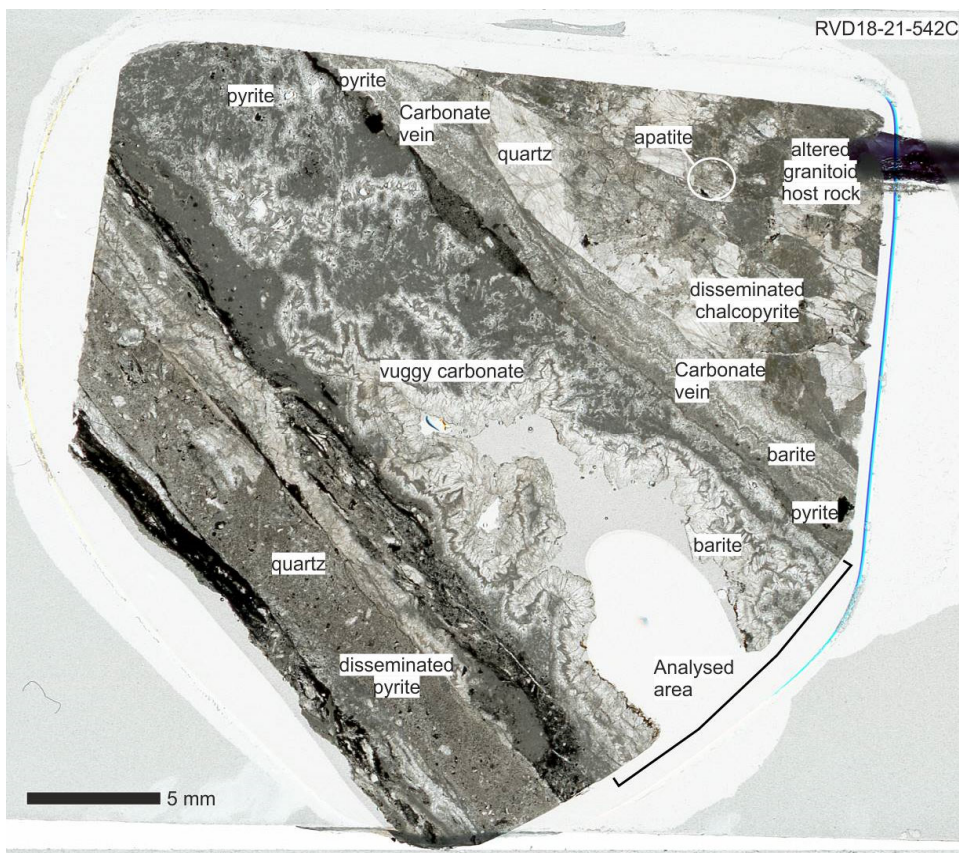

Figure 18: 542C



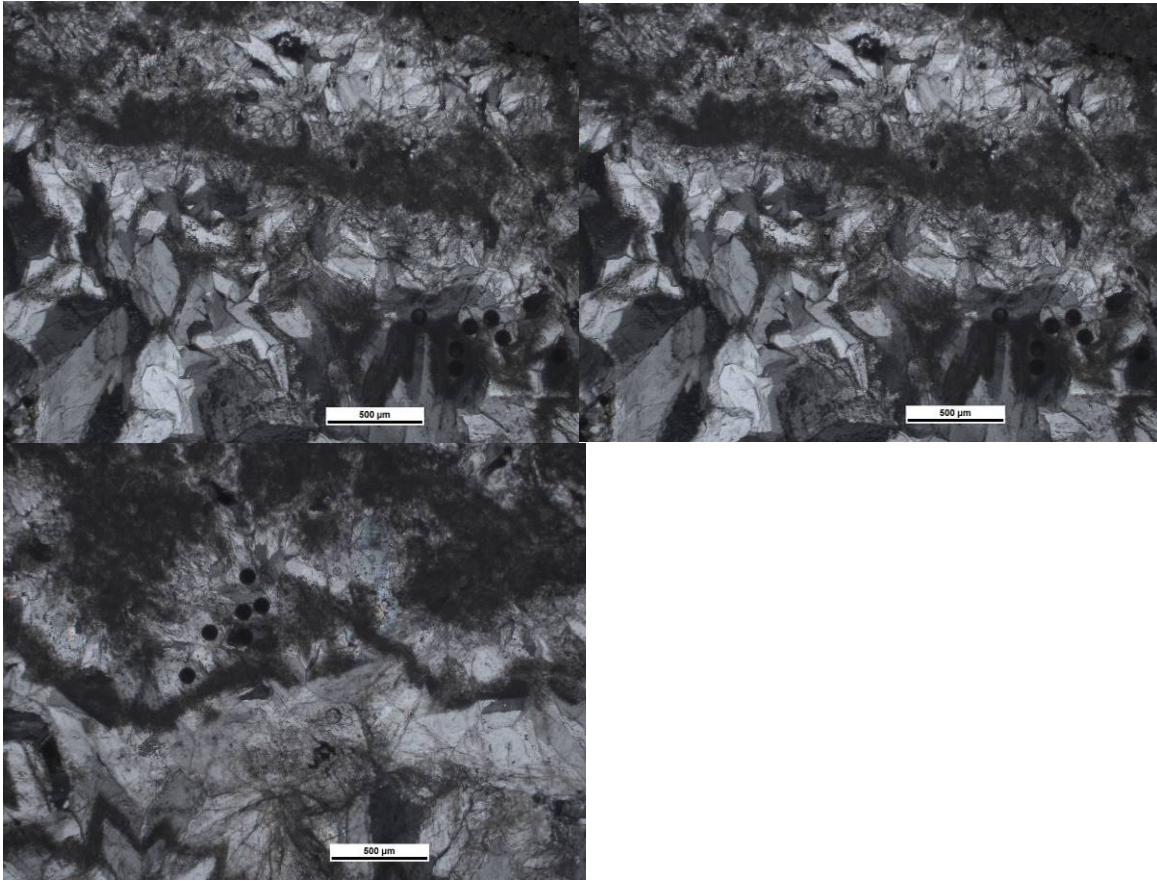

*Figure 19: X-polarized light images of vuggy carbonate in sample RVD18-21-542C*

#### **542D thin section characterization.**

Section 542D has altered granitoid at the edges. The centre of the section is dominated by a seemingly multi-layered carbonate vein (Figure 23-24). There is a vuggy vein ~1 cm thick with the characteristic textures displayed in section 542B and C in vein (2; Figure 24, 26). Concordant with this are several other carbonate veins ~3-5 mm thick separated from one another by very fine-grained silica (Figure. 25). Both the vuggy vein (2) and the other carbonate veins were analyzed, including part of a vein that has a pyrite crust (Figure 25).

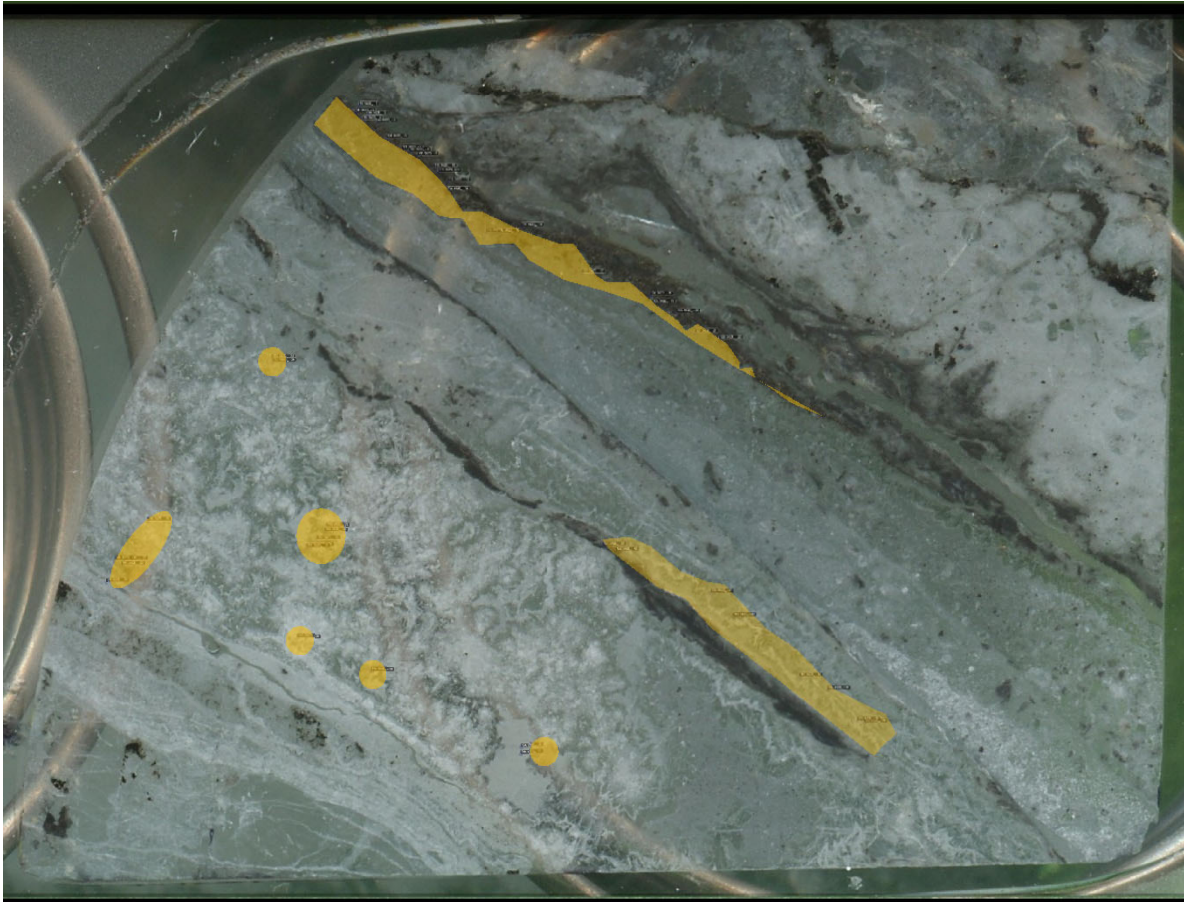

*Figure 20 Section RVD18-21-542D Analysed portion of vuggy and secondary carbonate is highlighted in yellow*



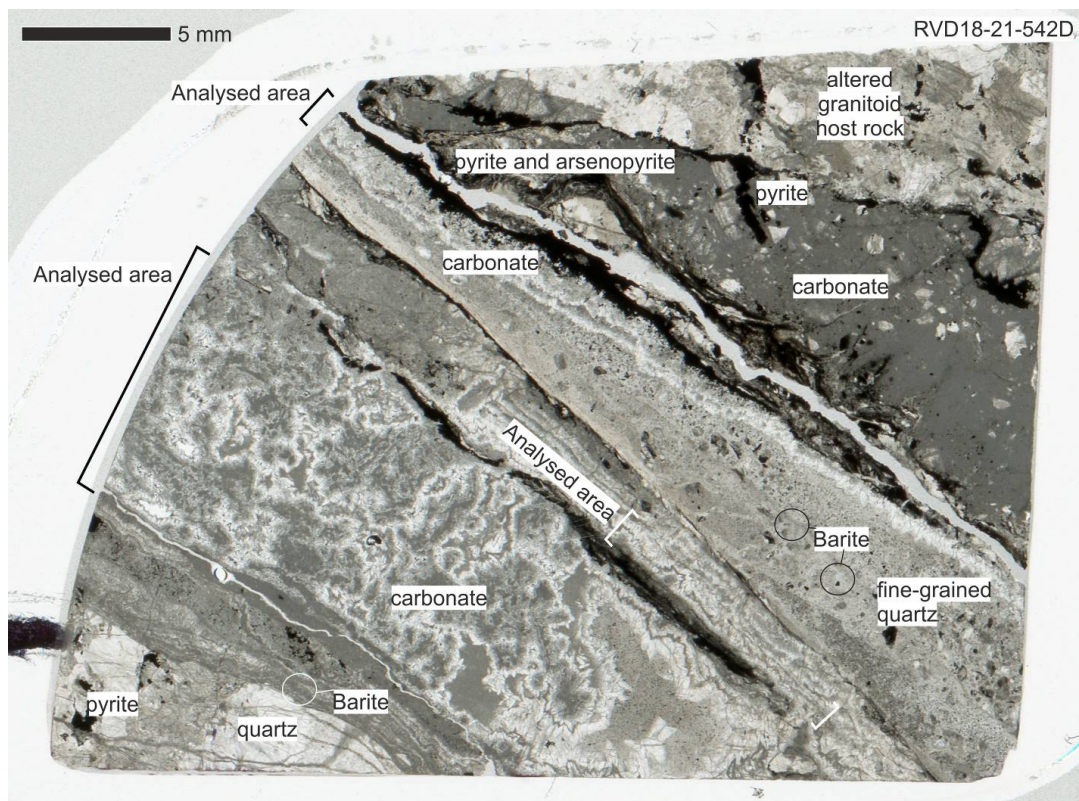

Figure 21: RVD18-21-542D with key minerals annotated

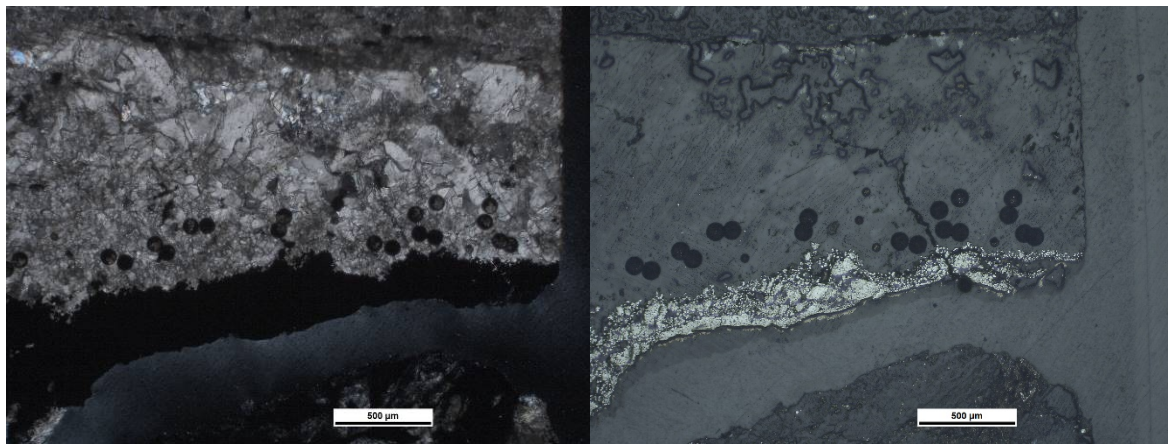

Figure 22 X-polarized and reflected light images of secondary carbonate veins in sample RVD18-21-542D

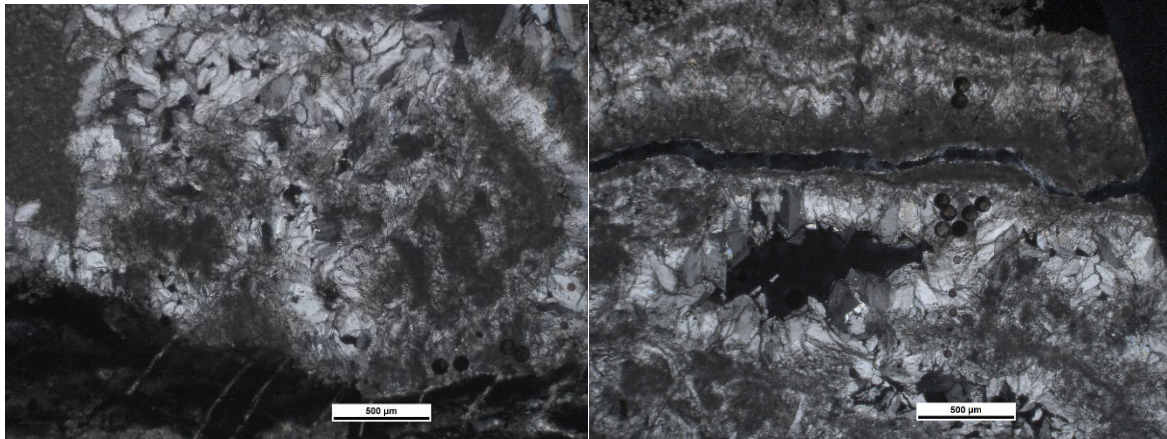

Figure 23: X-polarized images of vuggy carbonate veins in sample RVD18-21-542D

### DDH RVD18-21-548 general description

On a hand specimen level, this NE-SW striking, high angle vein has several layers- a pinkish straight 2 mm carbonate with a pyrite crust concordant with a ~1cm grey fine-grained brecciated vein. This material has a matrix of very fine-grained silica separating fragments of quartz with a carbonate in-fill

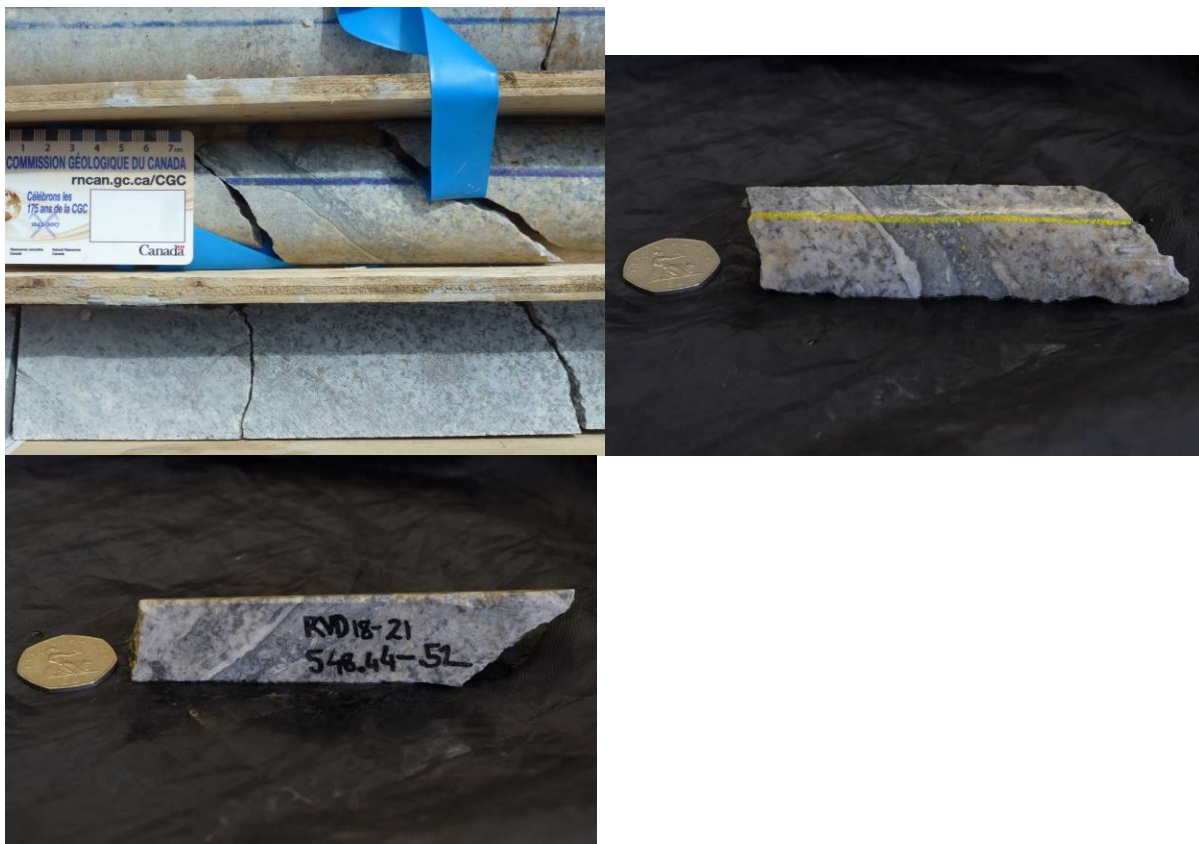

Figure 24: RVD18-21-548 core, hand specimen and thin section images

#### **548A thin section characterization**

Section 548A is comprised of several different concordant layers comprised of fine-grained silica with fragments of minerals and rock and separated by carbonate veins. The analyzed area is primarily a ~2 mm thick carbonate vein that has euhedral, elongate-blocky crystals that increase in size from the NE corner of the section (in Figure 28-30). The crystals are all pointed in the same direction (towards the SW corner in Figure 29-30), which can be interpreted to suggest that they grew uniformly from the wall rock. There is a ~1 mm thick pyrite crust on the edge of the vein with layers of very fine-grained carbonate (analyzed; Figure 30).



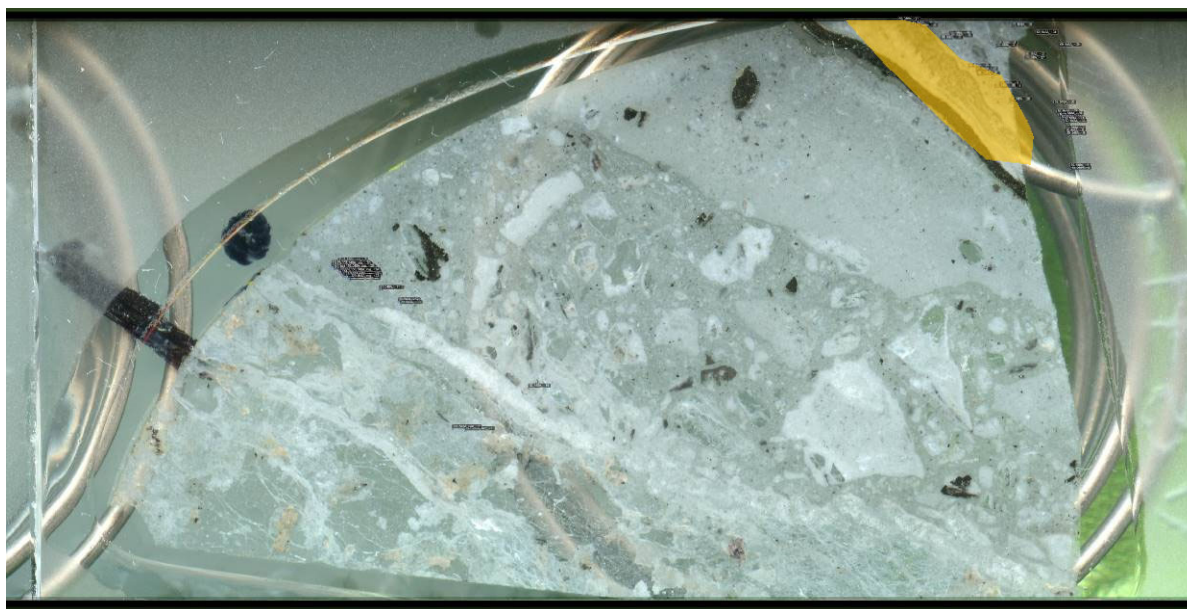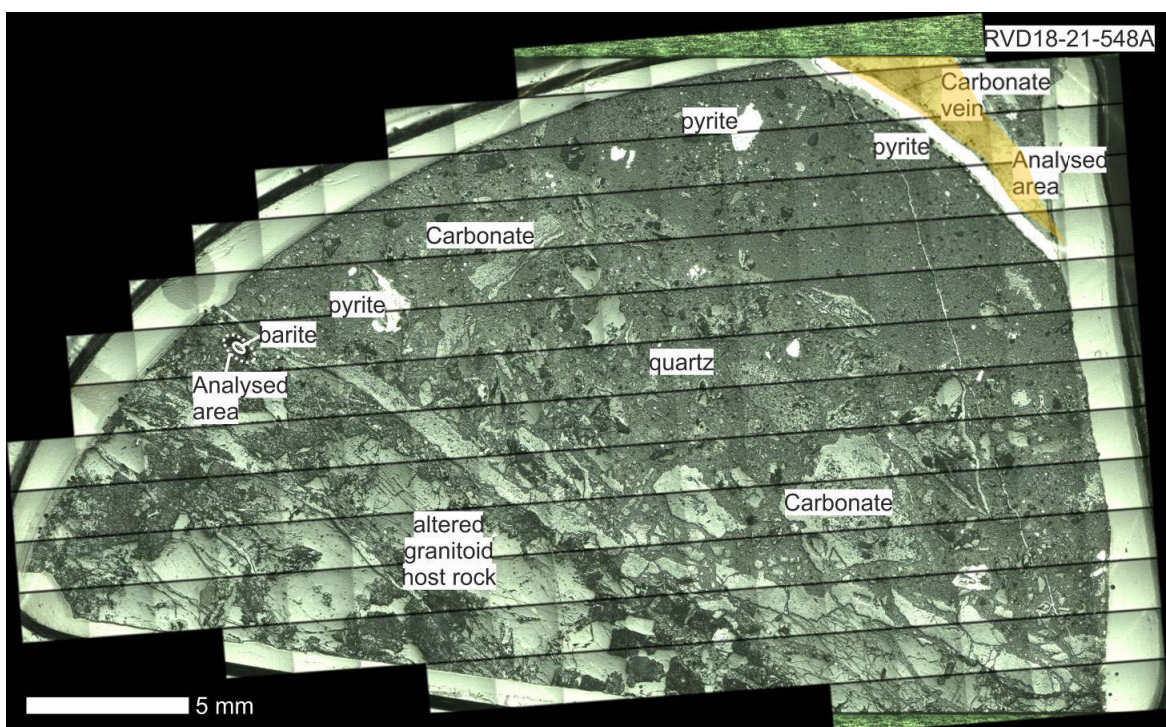

Figure 25: Section RVD18-21-548A scan and reflected light montage (as scanned image is slightly incorrectly aligned with respect to the analyzed spots). Analyzed portion of carbonate vein is highlighted in yellow.



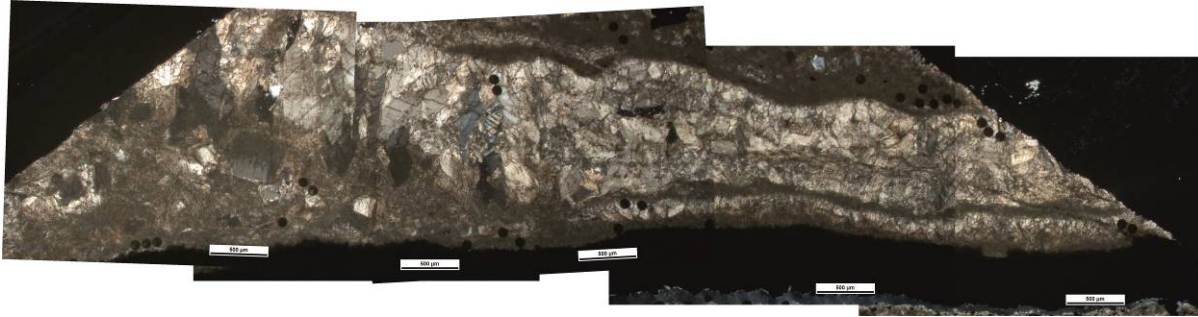

Figure 29: XPL stitched photomicrographs of vein in sample RVD19-21-548A

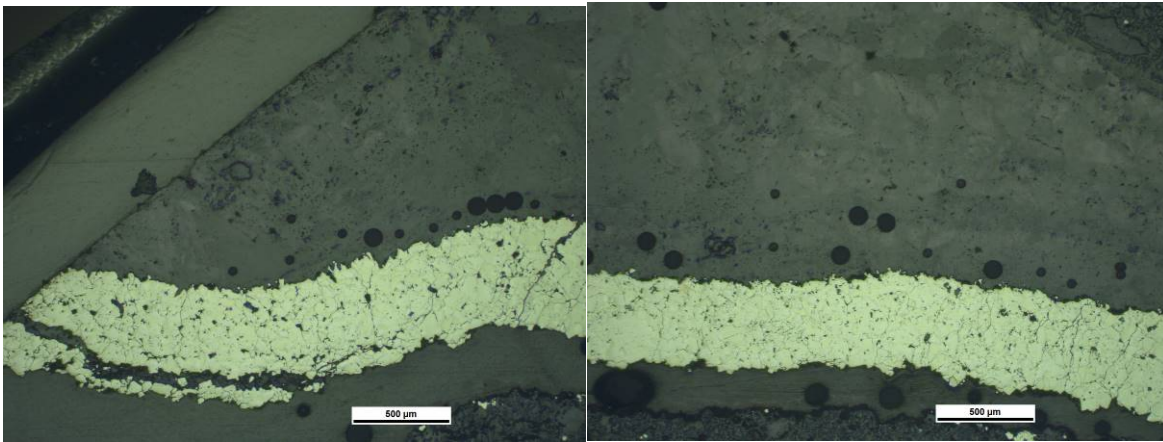

Figure 30 Reflected light image of RVD19-21-548A

### 548B thin section characterization

Section 548B contains the same pyrite-crusting carbonate vein described in section 548A. The section contains altered granitoid, the analyzed carbonate vein, a concordant fine-grained silica 'breccia', small fine-grained layers that can be interpreted as fault zones. The analyzed carbonate vein has euhedral blocky crystals that increase in size to ~1-2 mm in the centre of the vein (Figure 31-32). There is a pyrite crust on one edge (Figures 33-34) which can be interpreted as growth of carbonate and (re) crystallizing the pyrite at the same time.

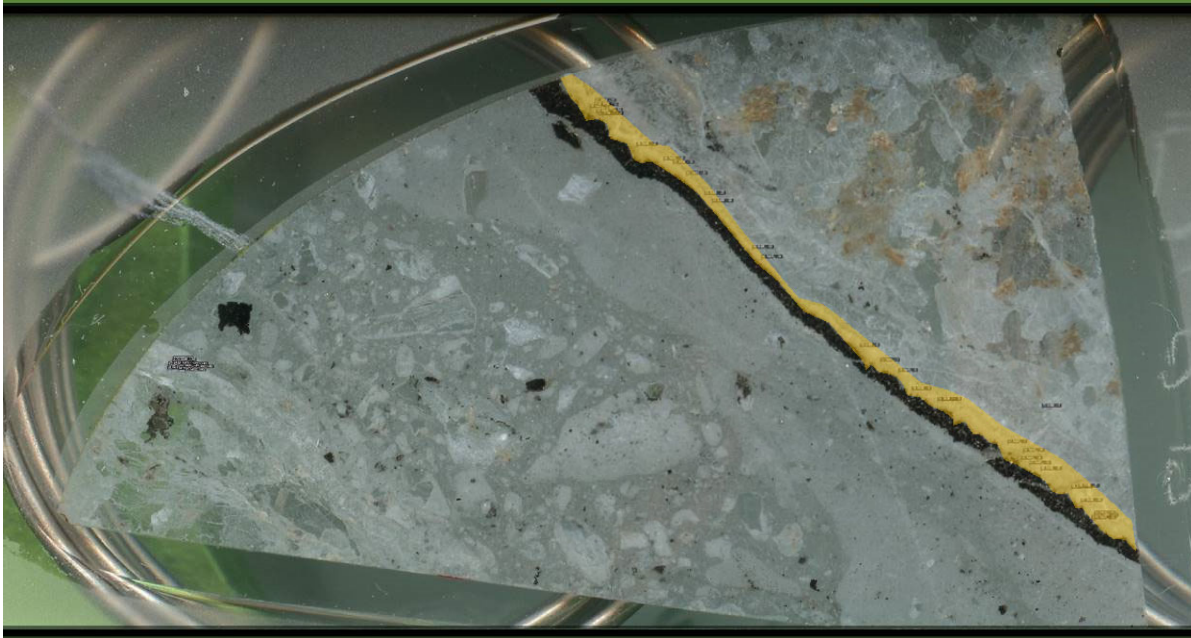

Figure 31: Section RVD18-21-548B Analyzed portion of carbonate vein is highlighted in yellow.

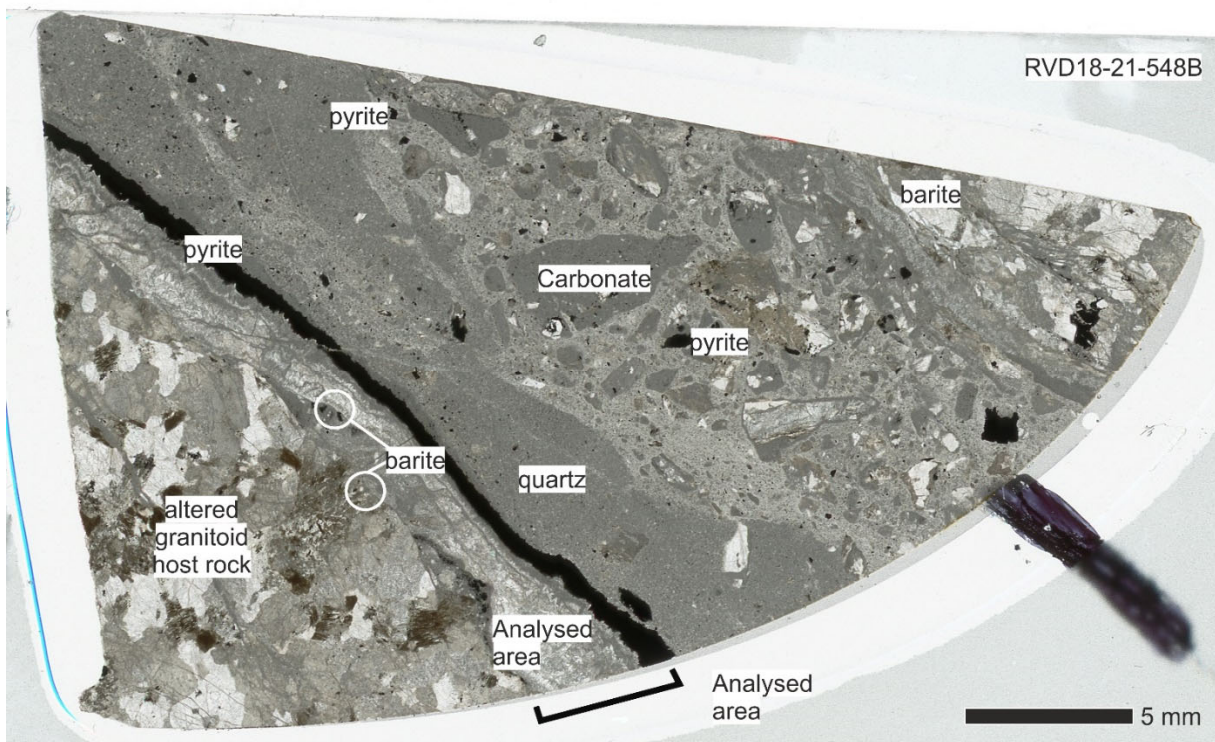

Figure 32: RVD18-21-548B with key minerals annotated



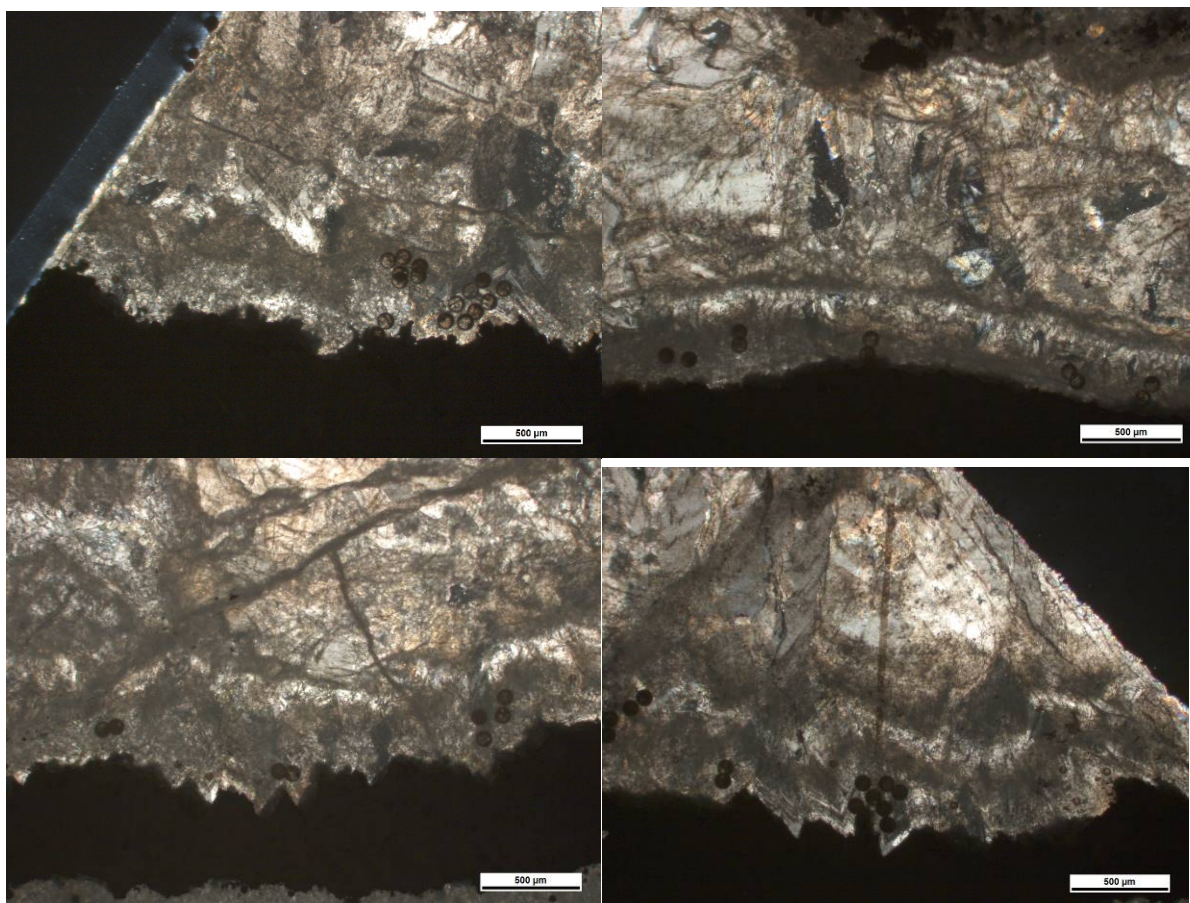

Figure 33: XPL photomicrograph of part of vein in sample RVD18-21-548B

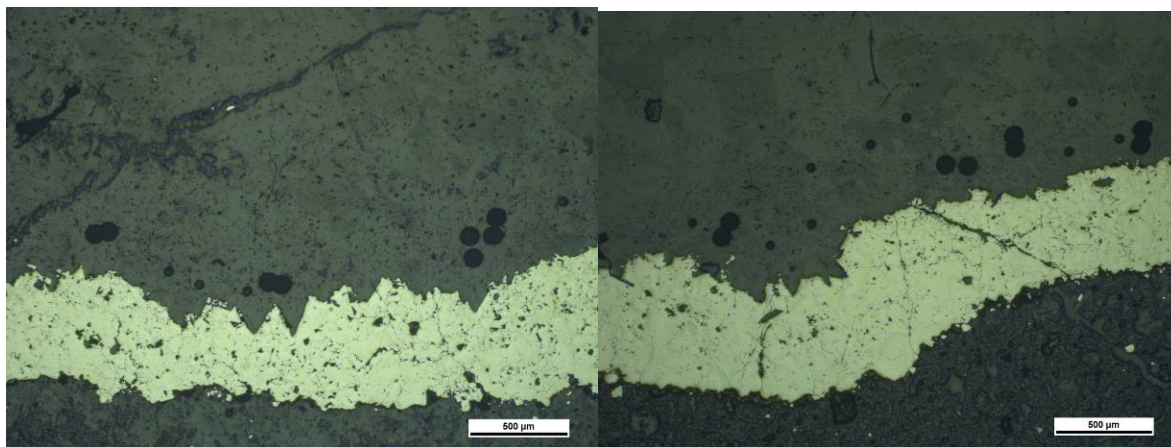

Figure 34: Reflected light image of pyrite-carbonate vein in sample RVD18-21-548B

#### 4. Detailed U-Pb results

##### DDH RVD18-19, 314m (19A) detailed sample interpretation

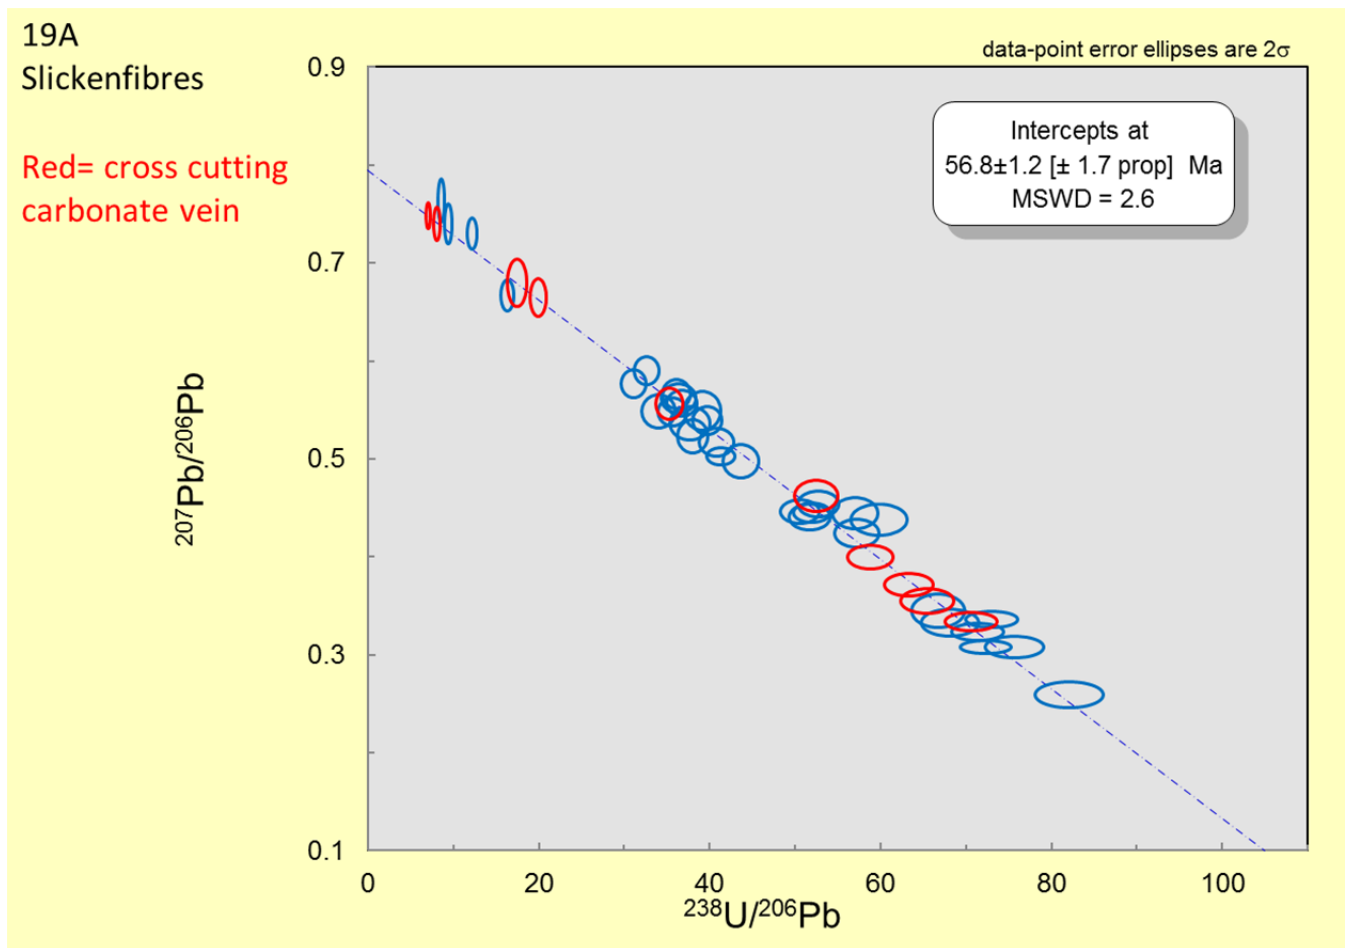

Figure 35: Tera Wasserburg plot of sample DDH RVD18-19, 314m (19A). Quoted uncertainties include fully propagated uncertainties.

The age of the sample (Fig. 35) can be interpreted as the timing of fracturing and slickenfibres growth at that time and is clearly post-dates and cross cuts the QFP dyke. As the dyke is also crosscut by mineralized veins this suggesting that the thin stringer veins and V3 veins are also post-QFP dyke emplacement. These dykes have been dated ~75 Ma (Allan et al., 2013; Friend et al., 2017) suggesting that these cross-cutting mineralized veins were emplaced between 75 and 57 Ma.

##### DDH RVD18-21, 542m detailed sample interpretation

- The whitish elongate-blocky crustiform carbonate with pyrite crust yields a ~73 Ma in sections A and B. The pyrite has two possible interpretations- (1) the pyrite vein is older than the carbonate and the 73 Ma carbonate vein split this older vein. (2) the pyrite is in equilibrium with the carbonate and grew as a crustiform edge on the carbonate vein. This interpretation is supported by the carbonate-pyrite crystal morphology.
- Vuggy carbonate and secondary carbonate veins crystallized at ~60 Ma.

- The multiple crack-seal events occurred in the same orientation and are also associated with polymetallic mineralization including barite. The consistency of the orientations suggests that if the veins are structurally controlled, the stress field remained roughly consistent or in a preferential orientation to reactivate these extensional fractures.

The Bluesky porphyry breccia contains abundant fault, fractures and veins. The carbonate veins dated in sample RVD-18-21-542m and 548m are roughly the same age as slickenfibres in sample DDH RVD18-19, 314m and fault gouge in sample RVD-18-21-553m, suggesting that the Bluesky porphyry breccia was fractured and faulted at the same time as fluid flow events.

#### DDH RVD18-21, 548 m

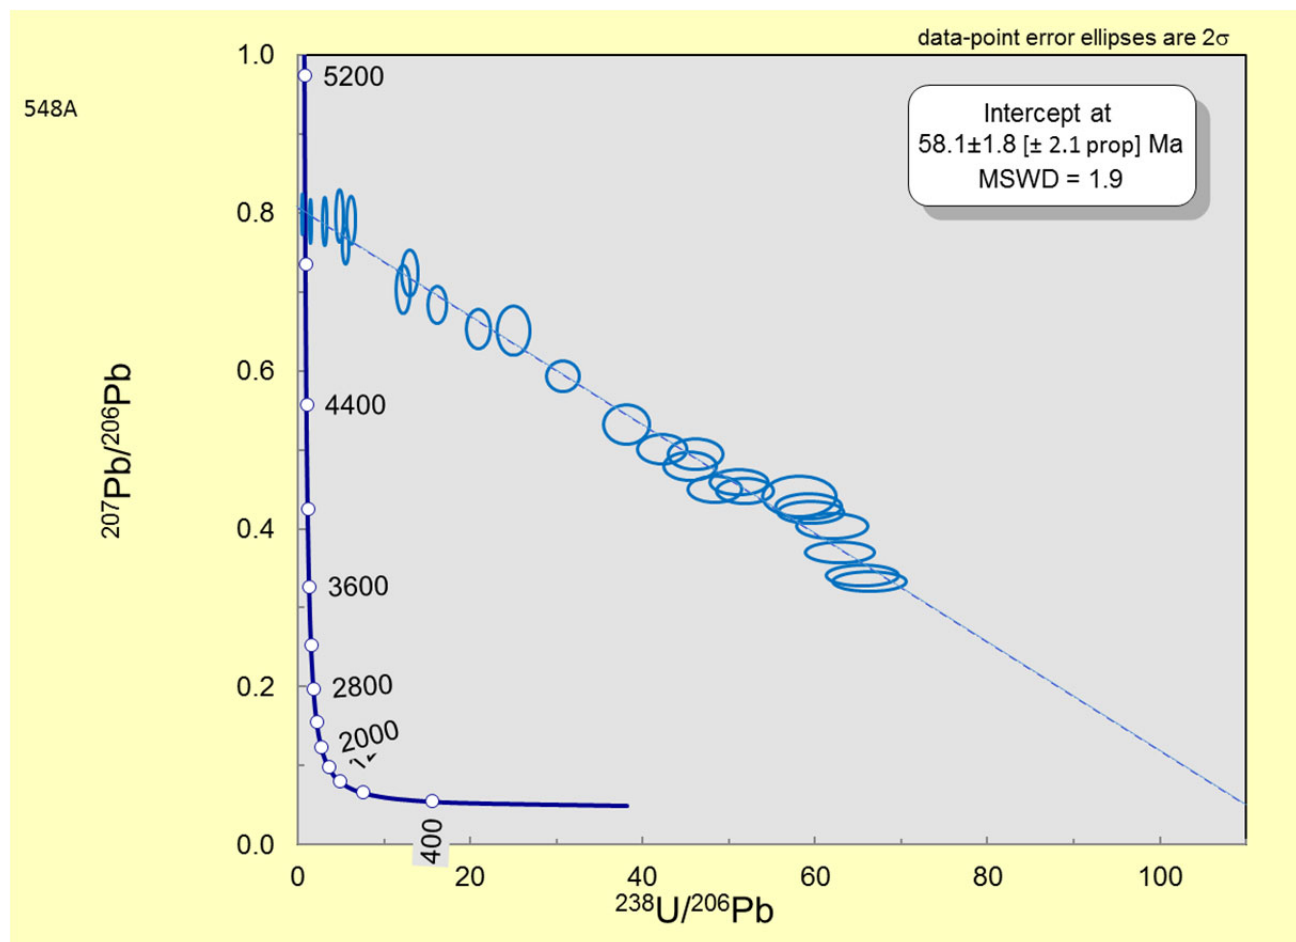

Figure 36: Tera Wasserburg plot for sample RVD-18-21-548A

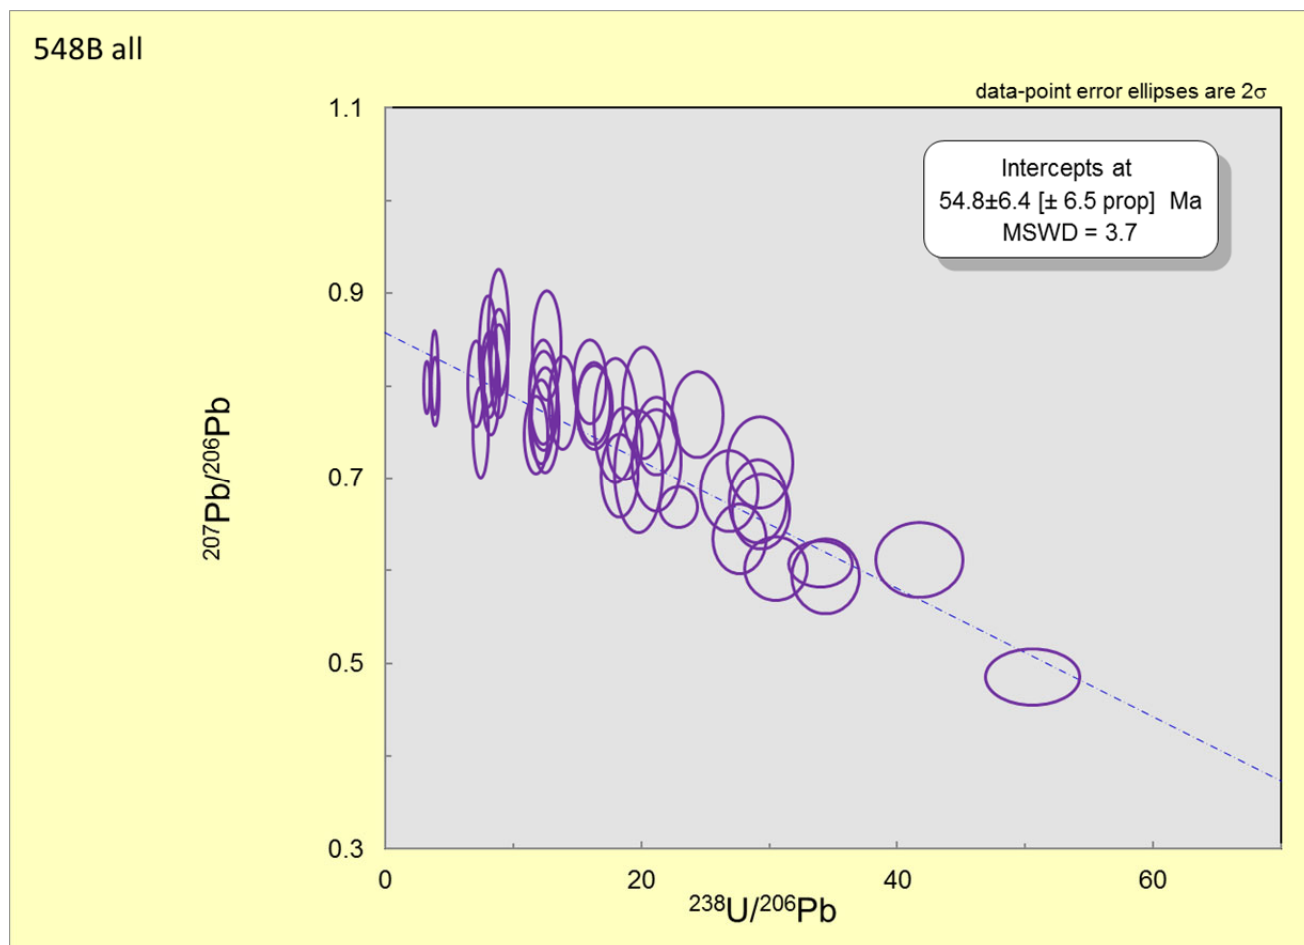

Figure 37: Tera Wasserburg plot for sample RVD-18-21-548B

Sample RVD-18-21-548A yielded  $\sim 0.05$ – $6$  ppm U and a  $^{206}\text{Pb}/^{238}\text{U}$  intercept age of  $58.1 \pm 1.8$  (MSWD 1.9;  $n=44$ ). Sample RVD-18-21-548B yielded  $\sim 0.08$ – $1.3$  ppm U and a  $^{206}\text{Pb}/^{238}\text{U}$  intercept of  $54.8 \pm 6.4$  Ma (MSWD 3.7,  $n=29$ ).

### Interpretation

The two analysed carbonate veins from sample 548 yield inaccurate ages between  $\sim 60$ – $55$  Ma, consistent with the interpreted vuggy carbonate crystallization in sample 542 from the same core.

## 5. Structural data (used in Fig.1 d-e)

### 5.1 Planar data

| Waypoint         | Strike (RHR) | Dip | Description   | Type       |
|------------------|--------------|-----|---------------|------------|
| 3 Big Creek road | 200          | 87  | Crush breccia | Field data |
| 2 Big Creek road | 182          | 52  | Fault plane   | Field data |
| 2 Big Creek road | 178          | 56  | Fault plane   | Field data |
| 2 Big Creek road | 183          | 63  | Fault plane   | Field data |
| 2 Big Creek road | 213          | 69  | Fault plane   | Field data |

|                   |     |    |                                       |            |
|-------------------|-----|----|---------------------------------------|------------|
| 2 Big Creek road  | 348 | 70 | Fault plane                           | Field data |
| 2 Big Creek road  | 205 | 75 | Fault plane                           | Field data |
| 2 Big Creek road  | 255 | 80 | Fault plane                           | Field data |
| 2 Big Creek road  | 86  | 86 | Fault plane                           | Field data |
| 2 Big Creek road  | 262 | 86 | Fault plane                           | Field data |
| 2 Big Creek road  | 169 | 89 | Fault plane                           | Field data |
| 3 Big Creek road  | 193 | 72 | Fault plane                           | Field data |
| 3 Big Creek road  | 205 | 85 | Fault plane                           | Field data |
| 3 Big Creek road  | 201 | 85 | Fault plane                           | Field data |
| 3 Big Creek road  | 192 | 86 | Fault plane                           | Field data |
| 3 Big Creek road  | 200 | 87 | Fault plane                           | Field data |
| 9 Big Creek road  | 219 | 43 | Fault plane                           | Field data |
| 9 Big Creek road  | 182 | 82 | Fault plane                           | Field data |
| 10 Big Creek road | 144 | 87 | Fault plane                           | Field data |
| 2 Big Creek road  | 187 | 75 | fault gouge edge plane                | Field data |
| 2 Big Creek road  | 178 | 56 | fault gouge edge plane                | Field data |
| 3 Big Creek road  | 203 | 70 | Fault plane                           | Field data |
| 3 Big Creek road  | 205 | 90 | Fault plane                           | Field data |
| Seymour Creek     | 97  | 75 | Gouge zone                            | Field data |
| Mechanic Creek    | 150 | 90 | Gouge zone                            | Field data |
| Happy Creek       | 263 | 76 | Gouge zone                            | Field data |
| Blue Sky 1        | 109 | 74 | Fault within Bluesky Porphyry Breccia | Core data  |
| Blue Sky 1        | 110 | 74 | Fault within Bluesky Porphyry Breccia | Core data  |
| Blue Sky 1        | 115 | 76 | Fault within Bluesky Porphyry Breccia | Core data  |
| Blue Sky 1        | 115 | 76 | Fault within Bluesky Porphyry Breccia | Core data  |
| Blue Sky 1        | 105 | 76 | Fault within Bluesky Porphyry Breccia | Core data  |
| Blue Sky 2        | 113 | 76 | Fault within Bluesky Porphyry Breccia | Core data  |
| Blue Sky 2        | 136 | 68 | Fault within Bluesky Porphyry Breccia | Core data  |
| Blue Sky 3        | 130 | 76 | Fault within Bluesky Porphyry Breccia | Core data  |
| Blue Sky 3        | 137 | 67 | Fault within Bluesky Porphyry Breccia | Core data  |
| Blue Sky 3        | 131 | 68 | Fault within Bluesky Porphyry Breccia | Core data  |
| Blue Sky 3        | 131 | 68 | Fault within Bluesky Porphyry Breccia | Core data  |
| Blue Sky 3        | 128 | 65 | Fault within Bluesky Porphyry Breccia | Core data  |
| Blue Sky 3        | 118 | 64 | Fault within Bluesky Porphyry Breccia | Core data  |
| Blue Sky 3        | 86  | 61 | Fault within Bluesky Porphyry Breccia | Core data  |
| Blue Sky 3        | 151 | 72 | Fault within Bluesky Porphyry Breccia | Core data  |
| Blue Sky 3        | 168 | 73 | Fault within Bluesky Porphyry Breccia | Core data  |
| Blue Sky 4        | 155 | 73 | Fault within Bluesky Porphyry Breccia | Core data  |
| RVD-18-21-542.44  | 239 | 73 | Analyzed carbonate vein               | Core data  |
| RVD-18-21-548.44  | 242 | 65 | Analyzed carbonate vein               | Core data  |

## 5.2 Linear data

| Waypoint         | Trend | Plunge | Sense of movement                 | Description  | Type       |
|------------------|-------|--------|-----------------------------------|--------------|------------|
| 2 Big Creek road | 351   | 15     |                                   | Lineation    | Field data |
| 3 Big Creek road | 120   | 0      | ?                                 | slickenside  | Field data |
| 3 Big Creek road | 249   | 1      |                                   | Slickenside  | Field data |
| 3 Big Creek road | 294   | 6      |                                   | Slickenside  | Field data |
| 3 Big Creek road | 268   | 5      |                                   | Slickenside  | Field data |
| 4 Big Creek road | 137   | 8      | Sinistral                         | slickenfibre | Field data |
| 4 Big Creek road | 322   | 10     | Sinistral                         | slickenfibre | Field data |
| 4 Big Creek road | 150   | 16     |                                   | Slickenside  | Field data |
| 4 Big Creek road | 126   | 12     |                                   | Slickenside  | Field data |
| 4 Big Creek road | 104   | 5      |                                   | Slickenside  | Field data |
| 4 Big Creek road | 123   | 10     |                                   | Slickenside  | Field data |
| 4 Big Creek road | 296   | 11     |                                   | Slickenside  | Field data |
| 4 Big Creek road | 295   | 10     |                                   | Slickenside  | Field data |
| 5 Big Creek road | 254   | 18     | sinistral                         | slickenfibre | Field data |
| 5 Big Creek road | 255   | 2      | sinistral                         | slickenfibre | Field data |
| 5 Big Creek road | 344   | 6      | Dextral                           | slickenfibre | Field data |
| 5 Big Creek road | 153   | 10     | sinistral                         | slickenfibre | Field data |
| 5 Big Creek road | 94    | 2      | sinistral                         | slickenfibre | Field data |
| 5 Big Creek road | 86    | 4      | sinistral                         | slickenfibre | Field data |
| 5 Big Creek road | 92    | 2      | Dextral                           | slickenfibre | Field data |
| 5 Big Creek road | 106   | 48     | Dextral                           | Slickenside  | Field data |
| 5 Big Creek road | 263   | 48     |                                   | Slickenside  | Field data |
| 5 Big Creek road | 216   | 49     | Normal                            | Slickenside  | Field data |
| 5 Big Creek road | 86    | 1      | Dextral                           | Slickenside  | Field data |
| 5 Big Creek road | 246   | 2      |                                   | Slickenside  | Field data |
| 5 Big Creek road | 106   | 1      | Sinistral                         | Slickenside  | Field data |
| 5 Big Creek road | 261   | 4      | Sinistral                         | Slickenside  | Field data |
| 5 Big Creek road | 172   | 6      | Sinistral                         | Slickenside  | Field data |
| 5 Big Creek road | 150   | 8      | Sinistral                         | Slickenside  | Field data |
| 5 Big Creek road | 46    | 22     | Sinistral                         | Slickenside  | Field data |
| 5 Big Creek road | 16    | 9      | Dextral                           | Slickenside  | Field data |
| 5 Big Creek road | 248   | 7      | Sinistral                         | Slickenside  | Field data |
| 5 Big Creek road | 205   | 9      | Sinistral                         | Slickenside  | Field data |
| 5 Big Creek road | 235   | 24     | Calcite Slickenfibre<br>sinistral | Slickenside  | Field data |
| 5 Big Creek road | 273   | 23     | Sinistral<br>Sample Y18-5a        | Slickenside  | Field data |
| 5 Big Creek road | 133   | 6      | Sinistral                         | Slickenside  | Field data |



|                   |     |    |           |              |            |
|-------------------|-----|----|-----------|--------------|------------|
| 6 Big Creek road  | 347 | 11 | Sinistral | Lineation    | Field data |
| 6 Big Creek road  | 332 | 11 | Sinistral | Lineation    | Field data |
| 6 Big Creek road  | 148 | 16 |           | Slickenside  | Field data |
| 6 Big Creek road  | 165 | 26 |           | Slickenside  | Field data |
| 6 Big Creek road  | 155 | 7  | Sinistral | Slickenside  | Field data |
| 6 Big Creek road  | 344 | 1  | Sinistral | Slickenside  | Field data |
| 6 Big Creek road  | 306 | 26 |           | Slickenside  | Field data |
| 6 Big Creek road  | 113 | 8  |           | Slickenside  | Field data |
| 7 Big Creek road  | 337 | 22 | sinistral | slickenfibre | Field data |
| 7 Big Creek road  | 13  | 10 |           | Slickenside  | Field data |
| 7 Big Creek road  | 115 | 17 |           | Slickenside  | Field data |
| 7 Big Creek road  | 107 | 10 |           | Slickenside  | Field data |
| 7 Big Creek road  | 110 | 18 |           | Slickenside  | Field data |
| 7 Big Creek road  | 22  | 4  |           | Slickenside  | Field data |
| 7 Big Creek road  | 337 | 22 |           | Slickenside  | Field data |
| 8 Big Creek road  | 343 | 1  | Dextral   | Slickenside  | Field data |
| 8 Big Creek road  | 169 | 14 | Sinistral | Slickenside  | Field data |
| 8 Big Creek road  | 347 | 9  | Dextral   | Slickenside  | Field data |
| 8 Big Creek road  | 351 | 20 |           | Slickenside  | Field data |
| 10 Big Creek road | 244 | 5  | Dextral   | Slickenside  | Field data |
| 10 Big Creek road | 225 | 2  | Dextral   | Slickenside  | Field data |
| 10 Big Creek road | 336 | 7  | Sinistral | Slickenside  | Field data |
| 10 Big Creek road | 51  | 17 |           | Slickenside  | Field data |
| 10 Big Creek road | 247 | 6  | Sinistral | Slickenside  | Field data |
| 10 Big Creek road | 66  | 1  | Sinistral | Slickenside  | Field data |
| 10 Big Creek road | 280 | 2  | Sinistral | Slickenside  | Field data |

### Brief structural interpretation

The main Big Creek Fault strands are oriented WNW-ESE with a dextral sense of shear. Slickensides and slickenfibres measured here have both sinistral and dextral sense of shear. The BCF system likely has Riedel systems with NW-SE striking Riedel planes. The sinistral shear sense is likely yielded from conjugates of the Riedel shears (R' planes) planes.

### References

- Allan, M.M., Mortensen, J.K., Hart, C.J.R., Bailey, L.A., Sánchez, M.G., Ciolkiewicz, W., McKenzie, G.G., and Creaser, R.A., 2013, Magmatic and metallogenic framework of west-central Yukon and eastern Alaska. Society of Economic Geologists, Special Publication 17, p.111-168.
- Black, L.P., Gulson, B.L., 1978. The age of the Mud Tank carbonatite, Strangways Range, Northern Territory. BMR J. Aust. Geol. Geophys. 3, 227 – 232.

- Bonhomme, M.G., Thuizat, R., Pinault, Y., Clauer, N., Wendling, R. and Winkler, R., 1975. Méthode de datation potassium-argon. Appareillage et technique. Strasbourg, 53 p.
- Dalrymple, G.B. and Lanphere, M.A., 1969. Potassium-argon dating. W.H. Freeman, San Francisco, 258 p.
- Dickin, A.P., 1995. Radiogenic isotope geology. Cambridge University Press, Cambridge, 490 p.
- Faure, G., 1986. Principles of isotope geology. John Wiley & Sons, New York, 589 p.
- Friend, M.A., Allan, M.M., and Hart, C.J.R., 2017, New contributions to the bedrock geology of the Mount Freegold district, Dawson Range, Yukon (NTS 115I/2, 6 and 7). *In: MacFarlane, K.E. (ed.) Yukon Exploration and Geology 2017*. Yukon Geological Survey, p.47-68.
- Heinrichs, H. and Herrmann, A.G., 1990. Praktikum der Analytischen Geochemie. Springer-Verlag, Berlin-Heidelberg, 669 p.
- Hess, J.C. and Lippolt, H.J., 1994. Compilation of K-Ar measurements on HD-B1 standard biotite. in: Odin G.S. (1994): Phanerozoic time scale, Bull. Lias. Inform., IUGS subcom. Geochronol., 12, Paris p. 19-23.
- Jackson, S. E., Pearson, N. J., Griffin, W. L., & Belousova, E. A. (2004). The application of laser ablation-inductively coupled plasma-mass spectrometry to in situ U-Pb zircon geochronology. *Chemical Geology*, 211(1-2), 47-69.
- Ludwig, K. R. (2003). Isoplot 3.00: A geochronological toolkit for Microsoft Excel. *Berkeley Geochronology Center Special Publication*, 4, 70.
- McDougall, I. and Roksandic, Z., 1974. Total fusion  $^{40}\text{Ar}/^{39}\text{Ar}$  ages using HIFAR reactor. *Journal of the Geological Society of Australia* 21, 81-89.
- Odin, G.S. & 35 collaborators 1982. Interlaboratory standards for dating purposes. in: ODIN, G.S. (editor) Numerical Dating in Stratigraphy. Part 1. John Wiley & Sons, Chichester, 123-148.
- Parrish, R. R., Parrish, C. M., & Lasalle, S. (2018). Vein calcite dating reveals Pyrenean orogen as cause of Paleogene deformation in southern England. *Journal of the Geological Society*, 175(3), 425-442.
- Paton, C., Hellstrom, J., Paul, B., Woodhead, J., & Hergt, J. (2011). Lolite: Freeware for the visualisation and processing of mass spectrometric data. *Journal of Analytical Atomic Spectrometry*, 26(12), 2508-2518.
- Pearce, N. J., Perkins, W. T., Westgate, J. A., Gorton, M. P., Jackson, S. E., Neal, C. R., & Chenery, S. P. (1997). A compilation of new and published major and trace element data for NIST SRM 610 and NIST SRM 612 glass reference materials. *Geostandards Newsletter*, 21(1), 115-144.
- Roberts, N. M., Rasbury, E. T., Parrish, R. R., Smith, C. J., Horstwood, M. S., & Condon, D. J. (2017). A calcite reference material for LA-ICP-MS U-Pb geochronology. *Geochemistry, Geophysics, Geosystems*, 18(7), 2807-2814.

- Stacey, J. T., & Kramers, J. (1975). Approximation of terrestrial lead isotope evolution by a two-stage model. *Earth and planetary science letters*, 26(2), 207-221.
- Steiger, R.H. and Jäger, E. 1977. Subcommittee on Geochronology: convention on the use of decay constants in geo- and cosmochemistry. *Earth and Planetary Science Letters* 36, 359-362.
